# Supplementary material for: A Genome-Wide Association Study of the Maize Hypersensitive Defense Response Identifies Genes That Cluster in Related Pathways
Source: PLoS Genet. 2014 Aug 28;10(8):e1004562. doi: 10.1371/journal.pgen.1004562 (PMC4148229; doi:10.1371/journal.pgen.1004562)
Supplement: File S2 — QTL allelic effects for each NAM population. (XLSX) [file pgen.1004562.s011.xlsx]

## Sheet: QTL allele effect
Trait	parameter	estimate	standard error	p value
LES	m201*pop 1	-0.00299268	0.0714299	0.9666
LES	m201*pop 2	0.365553	0.104489	0.0005
LES	m201*pop 3	-0.0832988	0.0652781	0.202
LES	m201*pop 4	0.401945	0.0745388	<0.0001
LES	m201*pop 5	0.58332	0.074393	<0.0001
LES	m201*pop 6	0.348877	0.070593	<0.0001
LES	m201*pop 7	0.489766	0.0696359	<0.0001
LES	m201*pop 8	-0.176075	0.112942	0.1191
LES	m201*pop 9	0.305554	0.0910771	0.0008
LES	m201*pop 11	0.553139	0.074219	<0.0001
LES	m201*pop 12	-0.0687751	0.0965289	0.4762
LES	m201*pop 13	0.438953	0.086487	<0.0001
LES	m201*pop 14	0.417679	0.0671165	<0.0001
LES	m201*pop 15	0.738553	0.0737873	<0.0001
LES	m201*pop 16	0.656011	0.0619171	<0.0001
LES	m201*pop 18	0.41195	0.0947855	<0.0001
LES	m201*pop 19	0.284644	0.124101	0.0219
LES	m201*pop 20	0.627121	0.0644018	<0.0001
LES	m201*pop 21	0.127077	0.119596	0.2881
LES	m201*pop 22	0.0113736	0.092009	0.9016
LES	m201*pop 23	0.017483	0.0964741	0.8562
LES	m201*pop 24	-0.382245	0.0971242	<0.0001
LES	m201*pop 25	0.625839	0.0622959	<0.0001
LES	m201*pop 26	0.317527	0.0773194	<0.0001
LES	m317*pop 1	0.15986	0.0715223	0.0255
LES	m317*pop 2	0.152495	0.107426	0.1559
LES	m317*pop 3	0.0750048	0.063629	0.2386
LES	m317*pop 4	0.0847725	0.0726517	0.2434
LES	m317*pop 5	-0.0578887	0.0750875	0.4408
LES	m317*pop 6	0.296366	0.0696781	<0.0001
LES	m317*pop 7	0.617717	0.0734578	<0.0001
LES	m317*pop 8	-0.0604751	0.115125	0.5994
LES	m317*pop 9	0.138539	0.0978894	0.1571
LES	m317*pop 11	0.196494	0.0761531	0.0099
LES	m317*pop 12	0.178767	0.0915432	0.0509
LES	m317*pop 13	0.207182	0.090294	0.0218
LES	m317*pop 14	0.181905	0.0680774	0.0076
LES	m317*pop 15	0.262495	0.0755204	0.0005
LES	m317*pop 16	-0.0156163	0.0670358	0.8158
LES	m317*pop 18	0.0270555	0.0974325	0.7813
LES	m317*pop 19	0.204222	0.111504	0.0671
LES	m317*pop 20	0.095726	0.0630229	0.1289
LES	m317*pop 21	0.122011	0.121117	0.3138
LES	m317*pop 22	0.193961	0.0913752	0.0339
LES	m317*pop 23	0.0188703	0.100801	0.8515
LES	m317*pop 24	-0.0420028	0.0988224	0.6708
LES	m317*pop 25	0.149809	0.0635188	0.0184
LES	m317*pop 26	0.0202275	0.0793549	0.7988
LES	m793*pop 1	0.130962	0.0582583	0.0247
LES	m793*pop 2	-0.10941	0.0883739	0.2158
LES	m793*pop 3	-0.0261271	0.0621878	0.6744
LES	m793*pop 4	-0.0868661	0.0599688	0.1476
LES	m793*pop 5	-0.0365244	0.0651675	0.5752
LES	m793*pop 6	0.180691	0.0600977	0.0027
LES	m793*pop 7	-0.0135182	0.0610855	0.8249
LES	m793*pop 8	-0.334032	0.0995677	0.0008
LES	m793*pop 9	-0.00338054	0.0893661	0.9698
LES	m793*pop 11	0.136929	0.0674884	0.0426
LES	m793*pop 12	0.0455019	0.0856745	0.5954
LES	m793*pop 13	0.0261127	0.0760216	0.7313
LES	m793*pop 14	0.172563	0.0587856	0.0034
LES	m793*pop 15	-0.193324	0.065309	0.0031
LES	m793*pop 16	0.108321	0.0561218	0.0537
LES	m793*pop 18	0.0330183	0.101182	0.7442
LES	m793*pop 19	0.0378995	0.0921363	0.6809
LES	m793*pop 20	0.302585	0.0605953	<0.0001
LES	m793*pop 21	0.0217245	0.112175	0.8465
LES	m793*pop 22	0.0935071	0.0900011	0.2989
LES	m793*pop 23	0.0313995	0.0924651	0.7342
LES	m793*pop 24	-0.10227	0.0972106	0.2929
LES	m793*pop 25	0.538461	0.0578796	<0.0001
LES	m793*pop 26	0.00864371	0.0635642	0.8918
LES	m1287*pop 1	0.0199154	0.0604331	0.7418
LES	m1287*pop 2	-0.06805	0.096739	0.4818
LES	m1287*pop 3	0.0136246	0.0612553	0.824
LES	m1287*pop 4	-0.11789	0.0668278	0.0778
LES	m1287*pop 5	-0.0324852	0.0646429	0.6153
LES	m1287*pop 6	-0.0908606	0.0650397	0.1625
LES	m1287*pop 7	-0.150183	0.0656921	0.0223
LES	m1287*pop 8	0.0279928	0.107228	0.7941
LES	m1287*pop 9	-0.152202	0.0941384	0.106
LES	m1287*pop 11	-0.0918573	0.0677093	0.175
LES	m1287*pop 12	0.0177002	0.0836675	0.8325
LES	m1287*pop 13	-0.152429	0.0798737	0.0565
LES	m1287*pop 14	-0.213918	0.0645196	0.0009
LES	m1287*pop 15	-0.119441	0.0653267	0.0676
LES	m1287*pop 16	-0.27004	0.0616366	<0.0001
LES	m1287*pop 18	-0.00831614	0.100803	0.9343
LES	m1287*pop 19	-0.158142	0.0992888	0.1113
LES	m1287*pop 20	-0.165712	0.0623894	0.008
LES	m1287*pop 21	-0.176259	0.104029	0.0903
LES	m1287*pop 22	-0.129683	0.0867412	0.135
LES	m1287*pop 23	0.0910481	0.101631	0.3704
LES	m1287*pop 24	-0.225163	0.100161	0.0247
LES	m1287*pop 25	-0.208015	0.058196	0.0004
LES	m1287*pop 26	-0.0252359	0.0698515	0.7179
LES	m1489*pop 1	-0.110958	0.0757018	0.1428
LES	m1489*pop 2	-0.149778	0.122936	0.2232
LES	m1489*pop 3	-0.214631	0.0675612	0.0015
LES	m1489*pop 4	-0.283022	0.0818286	0.0006
LES	m1489*pop 5	-0.270715	0.0678132	<0.0001
LES	m1489*pop 6	0.00110923	0.0688842	0.9872
LES	m1489*pop 7	-0.226435	0.0701183	0.0013
LES	m1489*pop 8	0.226509	0.1101	0.0398
LES	m1489*pop 9	-0.0169766	0.0979416	0.8624
LES	m1489*pop 11	0.360292	0.0833905	<0.0001
LES	m1489*pop 12	-0.365029	0.105625	0.0006
LES	m1489*pop 13	0.0696122	0.0758774	0.359
LES	m1489*pop 14	0.211868	0.0778688	0.0066
LES	m1489*pop 15	0.217696	0.0826024	0.0085
LES	m1489*pop 16	-0.0123927	0.0761342	0.8707
LES	m1489*pop 18	3.3428e-05	0.118658	0.9998
LES	m1489*pop 19	0.0624505	0.140594	0.6569
LES	m1489*pop 20	-0.207051	0.0628508	0.001
LES	m1489*pop 21	-0.00801577	0.113612	0.9438
LES	m1489*pop 22	-0.0605418	0.101735	0.5518
LES	m1489*pop 23	-0.119786	0.116186	0.3026
LES	m1489*pop 24	0.24219	0.120911	0.0453
LES	m1489*pop 25	-0.0872467	0.0657645	0.1847
LES	m1489*pop 26	-0.0317455	0.0860325	0.7122
LES	m1576*pop 1	-0.144723	0.0741775	0.0512
LES	m1576*pop 2	0.184603	0.118558	0.1196
LES	m1576*pop 3	0.0481992	0.065916	0.4647
LES	m1576*pop 4	0.0537257	0.0789542	0.4963
LES	m1576*pop 5	0.0643658	0.0664793	0.333
LES	m1576*pop 6	-0.0492319	0.0682917	0.471
LES	m1576*pop 7	-0.0951058	0.0687158	0.1665
LES	m1576*pop 8	-0.0359046	0.104547	0.7313
LES	m1576*pop 9	0.0490519	0.0955116	0.6076
LES	m1576*pop 11	-0.0571634	0.0815187	0.4832
LES	m1576*pop 12	0.00331884	0.106902	0.9752
LES	m1576*pop 13	-0.128125	0.0726057	0.0777
LES	m1576*pop 14	-0.0220457	0.072271	0.7604
LES	m1576*pop 15	-0.110573	0.0836098	0.1861
LES	m1576*pop 16	0.433813	0.0771795	<0.0001
LES	m1576*pop 18	-0.0435126	0.107623	0.686
LES	m1576*pop 19	0.161182	0.137967	0.2428
LES	m1576*pop 20	0.43449	0.0632003	<0.0001
LES	m1576*pop 21	0.0572005	0.134513	0.6707
LES	m1576*pop 22	0.0777985	0.0908504	0.3919
LES	m1576*pop 23	0.11792	0.113859	0.3005
LES	m1576*pop 24	-0.0484434	0.111739	0.6647
LES	m1576*pop 25	0.384912	0.0638168	<0.0001
LES	m1576*pop 26	0.204838	0.085876	0.0171
LES	m2188*pop 1	0.107957	0.0638909	0.0912
LES	m2188*pop 2	0.179777	0.0885125	0.0423
LES	m2188*pop 3	0.178241	0.0628447	0.0046
LES	m2188*pop 4	0.165219	0.0633799	0.0092
LES	m2188*pop 5	0.304525	0.0643575	<0.0001
LES	m2188*pop 6	0.336937	0.0622329	<0.0001
LES	m2188*pop 7	0.206328	0.0645706	0.0014
LES	m2188*pop 8	0.0838052	0.110307	0.4475
LES	m2188*pop 9	0.336639	0.0902863	0.0002
LES	m2188*pop 11	0.102074	0.0662815	0.1237
LES	m2188*pop 12	0.164565	0.0916218	0.0726
LES	m2188*pop 13	0.155944	0.0768614	0.0426
LES	m2188*pop 14	0.127285	0.0579932	0.0283
LES	m2188*pop 15	0.284672	0.0671101	<0.0001
LES	m2188*pop 16	0.198913	0.0608777	0.0011
LES	m2188*pop 18	0.079929	0.0967645	0.4089
LES	m2188*pop 19	0.128418	0.0886992	0.1478
LES	m2188*pop 20	0.522728	0.0625256	<0.0001
LES	m2188*pop 21	0.109751	0.096676	0.2564
LES	m2188*pop 22	-0.0109967	0.0906886	0.9035
LES	m2188*pop 23	0.307578	0.094086	0.0011
LES	m2188*pop 24	0.0221254	0.103381	0.8306
LES	m2188*pop 25	0.235637	0.0590942	<0.0001
LES	m2188*pop 26	0.223108	0.067931	0.001
LES	m2368*pop 1	0.00422219	0.0653795	0.9485
LES	m2368*pop 2	-0.163471	0.094642	0.0842
LES	m2368*pop 3	-0.129218	0.0627206	0.0395
LES	m2368*pop 4	-0.119594	0.063856	0.0612
LES	m2368*pop 5	0.015607	0.064171	0.8079
LES	m2368*pop 6	-0.138635	0.0608909	0.0229
LES	m2368*pop 7	-0.0911063	0.0656524	0.1653
LES	m2368*pop 8	0.176257	0.0968489	0.0689
LES	m2368*pop 9	-0.166058	0.0905838	0.0669
LES	m2368*pop 11	-0.202924	0.0715572	0.0046
LES	m2368*pop 12	0.0269385	0.0873404	0.7578
LES	m2368*pop 13	0.130616	0.0771007	0.0904
LES	m2368*pop 14	-0.183177	0.0575991	0.0015
LES	m2368*pop 15	0.119869	0.070676	0.09
LES	m2368*pop 16	-0.023175	0.0597713	0.6982
LES	m2368*pop 18	0.162854	0.096724	0.0924
LES	m2368*pop 19	0.0122034	0.097417	0.9003
LES	m2368*pop 20	0.0774539	0.0611867	0.2057
LES	m2368*pop 21	-0.000830088	0.104642	0.9937
LES	m2368*pop 22	-0.0184505	0.0901186	0.8378
LES	m2368*pop 23	0.0315034	0.0921856	0.7326
LES	m2368*pop 24	0.149308	0.100099	0.1359
LES	m2368*pop 25	-0.117702	0.0606458	0.0524
LES	m2368*pop 26	-0.224066	0.0655142	0.0006
LES	m2978*pop 1	0.0631551	0.0614532	0.3042
LES	m2978*pop 2	0.0339321	0.0956275	0.7227
LES	m2978*pop 3	0.0206774	0.0610348	0.7348
LES	m2978*pop 4	0.111543	0.0662965	0.0926
LES	m2978*pop 5	0.238939	0.0621532	0.0001
LES	m2978*pop 6	0.121024	0.064699	0.0615
LES	m2978*pop 7	-0.0299958	0.064027	0.6395
LES	m2978*pop 8	0.271709	0.0969981	0.0051
LES	m2978*pop 9	0.167503	0.0878561	0.0567
LES	m2978*pop 11	0.269584	0.0927979	0.0037
LES	m2978*pop 12	0.496097	0.0824342	<0.0001
LES	m2978*pop 13	0.0418249	0.0726879	0.5651
LES	m2978*pop 14	0.119461	0.0589402	0.0428
LES	m2978*pop 15	0.11064	0.0675728	0.1017
LES	m2978*pop 16	0.379103	0.0597562	<0.0001
LES	m2978*pop 18	0.168206	0.0961255	0.0803
LES	m2978*pop 19	0.144311	0.0898487	0.1084
LES	m2978*pop 20	0.235633	0.059352	<0.0001
LES	m2978*pop 21	0.205422	0.112138	0.0671
LES	m2978*pop 22	0.106015	0.0904025	0.241
LES	m2978*pop 23	0.223807	0.110059	0.0421
LES	m2978*pop 24	0.408308	0.100402	<0.0001
LES	m2978*pop 25	0.349115	0.061435	<0.0001
LES	m2978*pop 26	0.0933357	0.063295	0.1404
LES	m3202*pop 1	-0.17617	0.0612067	0.004
LES	m3202*pop 2	0.0475366	0.0912689	0.6025
LES	m3202*pop 3	0.00576378	0.0600994	0.9236
LES	m3202*pop 4	-0.113426	0.0620757	0.0678
LES	m3202*pop 5	0.0307989	0.0630452	0.6252
LES	m3202*pop 6	0.172627	0.0637969	0.0069
LES	m3202*pop 7	0.0256261	0.0660294	0.698
LES	m3202*pop 8	0.0792348	0.0926907	0.3927
LES	m3202*pop 9	-0.111021	0.092125	0.2283
LES	m3202*pop 11	-0.0375836	0.0701355	0.5921
LES	m3202*pop 12	0.095643	0.0890647	0.283
LES	m3202*pop 13	0.02085	0.0785656	0.7907
LES	m3202*pop 14	-0.0702512	0.0561397	0.2109
LES	m3202*pop 15	-0.250553	0.0680416	0.0002
LES	m3202*pop 16	-0.118344	0.0600289	0.0488
LES	m3202*pop 18	-0.209266	0.0975677	0.0321
LES	m3202*pop 19	-0.093832	0.0964963	0.3309
LES	m3202*pop 20	0.0764713	0.0585229	0.1914
LES	m3202*pop 21	0.210127	0.094885	0.0269
LES	m3202*pop 22	-0.136046	0.0909045	0.1346
LES	m3202*pop 23	-0.168224	0.106293	0.1136
LES	m3202*pop 24	-0.181065	0.092989	0.0516
LES	m3202*pop 25	-0.490699	0.0582239	<0.0001
LES	m3202*pop 26	0.269395	0.0649406	<0.0001
LES	m3503*pop 1	0.137235	0.0597281	0.0217
LES	m3503*pop 2	0.00108179	0.0866765	0.99
LES	m3503*pop 3	0.146954	0.0590857	0.0129
LES	m3503*pop 4	0.0535035	0.0605657	0.3771
LES	m3503*pop 5	0.181208	0.0614686	0.0032
LES	m3503*pop 6	-0.0951937	0.0641266	0.1378
LES	m3503*pop 7	0.220688	0.0607131	0.0003
LES	m3503*pop 8	0.217477	0.09383	0.0205
LES	m3503*pop 9	0.300584	0.0870555	0.0006
LES	m3503*pop 11	0.202346	0.0676989	0.0028
LES	m3503*pop 12	0.176037	0.0812154	0.0303
LES	m3503*pop 13	0.14854	0.0744218	0.046
LES	m3503*pop 14	0.334579	0.0578117	<0.0001
LES	m3503*pop 15	0.239119	0.0626803	0.0001
LES	m3503*pop 16	0.267194	0.0579489	<0.0001
LES	m3503*pop 18	0.198525	0.0862341	0.0214
LES	m3503*pop 19	0.13028	0.0854476	0.1275
LES	m3503*pop 20	0.378957	0.0572209	<0.0001
LES	m3503*pop 21	0.162501	0.0988521	0.1003
LES	m3503*pop 22	0.331992	0.0849077	<0.0001
LES	m3503*pop 23	0.177859	0.101379	0.0795
LES	m3503*pop 24	0.0519946	0.0940129	0.5803
LES	m3503*pop 25	0.110188	0.0591211	0.0625
LES	m3503*pop 26	0.164415	0.0670133	0.0142
LES	m3815*pop 1	0.0697731	0.0561062	0.2138
LES	m3815*pop 2	-0.0974022	0.091016	0.2846
LES	m3815*pop 3	0.099647	0.0606053	0.1003
LES	m3815*pop 4	0.213047	0.0652333	0.0011
LES	m3815*pop 5	0.015818	0.06556	0.8094
LES	m3815*pop 6	0.109882	0.0630068	0.0813
LES	m3815*pop 7	0.0471036	0.0638451	0.4607
LES	m3815*pop 8	0.00623105	0.100831	0.9507
LES	m3815*pop 9	0.175203	0.0914479	0.0555
LES	m3815*pop 11	0.0919594	0.0715493	0.1988
LES	m3815*pop 12	0.201812	0.0887886	0.0231
LES	m3815*pop 13	0.035366	0.0759711	0.6416
LES	m3815*pop 14	0.10641	0.0596033	0.0743
LES	m3815*pop 15	0.473014	0.0636266	<0.0001
LES	m3815*pop 16	0.251027	0.0576304	<0.0001
LES	m3815*pop 18	0.213063	0.0923018	0.0211
LES	m3815*pop 19	0.139157	0.0847493	0.1007
LES	m3815*pop 20	0.339514	0.0611515	<0.0001
LES	m3815*pop 21	0.128835	0.0963031	0.1811
LES	m3815*pop 22	0.0971018	0.0890119	0.2754
LES	m3815*pop 23	0.0349294	0.0985296	0.723
LES	m3815*pop 24	0.0269176	0.105056	0.7978
LES	m3815*pop 25	0.470086	0.0590586	<0.0001
LES	m3815*pop 26	0.154149	0.0691245	0.0258
LES	m4457*pop 1	0.0765158	0.0611238	0.2108
LES	m4457*pop 2	0.102277	0.0951276	0.2824
LES	m4457*pop 3	0.169108	0.059534	0.0045
LES	m4457*pop 4	0.0286041	0.0614305	0.6415
LES	m4457*pop 5	0.274884	0.0622845	<0.0001
LES	m4457*pop 6	0.186936	0.0611338	0.0023
LES	m4457*pop 7	0.141432	0.0626702	0.0241
LES	m4457*pop 8	0.289026	0.104978	0.0059
LES	m4457*pop 9	0.106583	0.0909285	0.2412
LES	m4457*pop 11	0.148292	0.067649	0.0285
LES	m4457*pop 12	-0.0508082	0.0917414	0.5798
LES	m4457*pop 13	0.178978	0.0788755	0.0233
LES	m4457*pop 14	0.256042	0.0578442	<0.0001
LES	m4457*pop 15	0.267488	0.0638128	<0.0001
LES	m4457*pop 16	0.323151	0.0596425	<0.0001
LES	m4457*pop 18	0.288936	0.0922476	0.0018
LES	m4457*pop 19	-0.0240106	0.0975264	0.8056
LES	m4457*pop 20	0.185564	0.0600041	0.002
LES	m4457*pop 21	0.107922	0.102588	0.2929
LES	m4457*pop 22	0.120806	0.087271	0.1664
LES	m4457*pop 23	0.0351675	0.105433	0.7387
LES	m4457*pop 24	0.123156	0.0908554	0.1754
LES	m4457*pop 25	0.280231	0.0601635	<0.0001
LES	m4457*pop 26	0.155035	0.0624927	0.0132
LES	m5067*pop 1	-0.137135	0.0581815	0.0185
LES	m5067*pop 2	-0.149494	0.0922162	0.1051
LES	m5067*pop 3	-0.0266892	0.0626624	0.6702
LES	m5067*pop 4	-0.0304119	0.0648521	0.6392
LES	m5067*pop 5	-0.0780253	0.0613568	0.2036
LES	m5067*pop 6	-0.19625	0.0600026	0.0011
LES	m5067*pop 7	-0.284378	0.0628511	<0.0001
LES	m5067*pop 8	-0.127587	0.104098	0.2204
LES	m5067*pop 9	0.0464155	0.0908599	0.6095
LES	m5067*pop 11	-0.132465	0.0663855	0.0461
LES	m5067*pop 12	0.0243712	0.0805517	0.7623
LES	m5067*pop 13	0.00948231	0.0739484	0.898
LES	m5067*pop 14	-0.124433	0.0585082	0.0335
LES	m5067*pop 15	-0.153012	0.0614148	0.0128
LES	m5067*pop 16	-0.0927975	0.0578478	0.1088
LES	m5067*pop 18	-0.246596	0.090299	0.0064
LES	m5067*pop 19	-0.0157707	0.0907692	0.8621
LES	m5067*pop 20	-0.231577	0.0596696	0.0001
LES	m5067*pop 21	-0.018527	0.0880485	0.8334
LES	m5067*pop 22	-0.143981	0.0934028	0.1233
LES	m5067*pop 23	-0.267204	0.0957812	0.0053
LES	m5067*pop 24	-0.206195	0.100418	0.0401
LES	m5067*pop 25	0.0708784	0.0592443	0.2317
LES	m5067*pop 26	-0.057578	0.063909	0.3677
LES	m5831*pop 1	0.02652	0.0570668	0.6422
LES	m5831*pop 2	0.205786	0.0907226	0.0234
LES	m5831*pop 3	0.0662704	0.0583041	0.2558
LES	m5831*pop 4	0.0665767	0.0637153	0.2962
LES	m5831*pop 5	0.193139	0.0608299	0.0015
LES	m5831*pop 6	0.011216	0.0624118	0.8574
LES	m5831*pop 7	0.116332	0.0642024	0.0701
LES	m5831*pop 8	0.183363	0.0940417	0.0513
LES	m5831*pop 9	0.264753	0.0926547	0.0043
LES	m5831*pop 11	0.0356423	0.067788	0.5991
LES	m5831*pop 12	0.150931	0.0830462	0.0693
LES	m5831*pop 13	0.187999	0.0743898	0.0116
LES	m5831*pop 14	0.00474121	0.0615362	0.9386
LES	m5831*pop 15	0.22776	0.0612324	0.0002
LES	m5831*pop 16	0.318137	0.0554382	<0.0001
LES	m5831*pop 18	-0.0429041	0.085801	0.6171
LES	m5831*pop 19	-0.0651545	0.0872234	0.4551
LES	m5831*pop 20	0.290448	0.0577352	<0.0001
LES	m5831*pop 21	-0.178163	0.0977876	0.0686
LES	m5831*pop 22	-0.0313698	0.0867557	0.7177
LES	m5831*pop 23	-0.167298	0.0896028	0.062
LES	m5831*pop 24	0.155621	0.0954356	0.1031
LES	m5831*pop 25	0.0665574	0.0581832	0.2528
LES	m5831*pop 26	-0.0572868	0.0649704	0.378
LES	m6353*pop 1	-0.156222	0.0731712	0.0329
LES	m6353*pop 2	-0.137509	0.107842	0.2024
LES	m6353*pop 3	-0.317683	0.0698604	<0.0001
LES	m6353*pop 4	-0.291716	0.0668679	<0.0001
LES	m6353*pop 5	-0.0824311	0.0741162	0.2662
LES	m6353*pop 6	-0.350946	0.0751867	<0.0001
LES	m6353*pop 7	-0.620044	0.0719021	<0.0001
LES	m6353*pop 8	-0.292939	0.116543	0.012
LES	m6353*pop 9	-0.283932	0.105554	0.0072
LES	m6353*pop 11	-0.230763	0.0811359	0.0045
LES	m6353*pop 12	-0.471518	0.124919	0.0002
LES	m6353*pop 13	-0.44681	0.0876103	<0.0001
LES	m6353*pop 14	-0.209192	0.0668992	0.0018
LES	m6353*pop 15	-0.143434	0.0726886	0.0486
LES	m6353*pop 16	-0.409512	0.0693124	<0.0001
LES	m6353*pop 18	-0.422674	0.0905616	<0.0001
LES	m6353*pop 19	-0.0293436	0.1153	0.7991
LES	m6353*pop 20	-0.59216	0.0671433	<0.0001
LES	m6353*pop 21	-0.137061	0.110129	0.2134
LES	m6353*pop 22	-0.147095	0.113675	0.1958
LES	m6353*pop 23	-0.221745	0.118224	0.0608
LES	m6353*pop 24	-0.0647625	0.109252	0.5534
LES	m6353*pop 25	-0.368875	0.0730238	<0.0001
LES	m6353*pop 26	-0.364062	0.075433	<0.0001
LES	m6447*pop 1	-0.245234	0.0788622	0.0019
LES	m6447*pop 2	0.245442	0.170037	0.149
LES	m6447*pop 3	0.0351221	0.0822664	0.6695
LES	m6447*pop 4	0.0633836	0.0699046	0.3646
LES	m6447*pop 5	-0.125715	0.0814642	0.1229
LES	m6447*pop 6	0.0130195	0.0778828	0.8673
LES	m6447*pop 7	-0.253462	0.0848585	0.0028
LES	m6447*pop 8	0.13292	0.106475	0.212
LES	m6447*pop 9	-0.124136	0.117964	0.2928
LES	m6447*pop 11	0.445493	0.090027	<0.0001
LES	m6447*pop 12	0.00881376	0.131543	0.9466
LES	m6447*pop 13	0.361508	0.089787	<0.0001
LES	m6447*pop 14	0.0771536	0.074454	0.3002
LES	m6447*pop 15	0.155628	0.0836027	0.0628
LES	m6447*pop 16	-0.05454	0.0744386	0.4638
LES	m6447*pop 18	0.00937424	0.110918	0.9327
LES	m6447*pop 19	-0.116747	0.114257	0.307
LES	m6447*pop 20	0.746077	0.0724168	<0.0001
LES	m6447*pop 21	0.0352963	0.109916	0.7481
LES	m6447*pop 22	0.234802	0.120461	0.0514
LES	m6447*pop 23	0.429791	0.13182	0.0011
LES	m6447*pop 24	0.64407	0.127922	<0.0001
LES	m6447*pop 25	0.553081	0.0796966	<0.0001
LES	m6447*pop 26	-0.0747035	0.0946293	0.4299
LES	m6536*pop 1	-0.167651	0.0707922	0.0179
LES	m6536*pop 2	0.055973	0.147715	0.7048
LES	m6536*pop 3	-0.10874	0.0703059	0.1221
LES	m6536*pop 4	-0.153512	0.0728544	0.0352
LES	m6536*pop 5	-0.133726	0.0707217	0.0588
LES	m6536*pop 6	0.107959	0.0674119	0.1094
LES	m6536*pop 7	-0.0708191	0.0757344	0.3498
LES	m6536*pop 8	-0.246349	0.109033	0.0239
LES	m6536*pop 9	-0.0896473	0.0995971	0.3682
LES	m6536*pop 11	-0.103242	0.0755029	0.1716
LES	m6536*pop 12	-0.0348291	0.0962242	0.7174
LES	m6536*pop 13	0.115084	0.0840055	0.1708
LES	m6536*pop 14	0.0941589	0.0667388	0.1584
LES	m6536*pop 15	-0.164275	0.0805407	0.0415
LES	m6536*pop 16	-0.0975838	0.0665351	0.1426
LES	m6536*pop 18	-0.168142	0.106622	0.1149
LES	m6536*pop 19	-0.0965959	0.118621	0.4155
LES	m6536*pop 20	-0.221738	0.0671445	0.001
LES	m6536*pop 21	-0.349464	0.109857	0.0015
LES	m6536*pop 22	-0.324056	0.114067	0.0045
LES	m6536*pop 23	-0.250139	0.124795	0.0451
LES	m6536*pop 24	-0.234967	0.113767	0.039
LES	m6536*pop 25	-0.12029	0.0705628	0.0884
LES	m6536*pop 26	0.0290974	0.0856484	0.7341
LES	m6874*pop 1	-0.0352751	0.0618965	0.5688
LES	m6874*pop 2	-0.231069	0.102795	0.0247
LES	m6874*pop 3	-0.0593552	0.0611908	0.3321
LES	m6874*pop 4	-0.210223	0.0671497	0.0018
LES	m6874*pop 5	-0.10823	0.0633586	0.0877
LES	m6874*pop 6	-0.118369	0.0644275	0.0663
LES	m6874*pop 7	0.510618	0.0671784	<0.0001
LES	m6874*pop 8	-0.158505	0.107555	0.1407
LES	m6874*pop 9	-0.16504	0.0930907	0.0764
LES	m6874*pop 11	-0.245119	0.0726138	0.0007
LES	m6874*pop 12	-0.139883	0.091708	0.1273
LES	m6874*pop 13	-0.125653	0.0749693	0.0938
LES	m6874*pop 14	-0.162098	0.0597551	0.0067
LES	m6874*pop 15	-0.260934	0.0642793	<0.0001
LES	m6874*pop 16	-0.0756885	0.0585636	0.1963
LES	m6874*pop 18	-0.315559	0.0988341	0.0014
LES	m6874*pop 19	-0.0844569	0.0954908	0.3765
LES	m6874*pop 20	0.33189	0.0600006	<0.0001
LES	m6874*pop 21	0.000928969	0.107643	0.9931
LES	m6874*pop 22	-0.0327122	0.0896421	0.7152
LES	m6874*pop 23	-0.116988	0.0997302	0.2409
LES	m6874*pop 24	-0.172279	0.10217	0.0919
LES	m6874*pop 25	-0.403279	0.0625379	<0.0001
LES	m6874*pop 26	-0.137833	0.0693095	0.0468
LES	m7027*pop 1	0.271284	0.0631516	<0.0001
LES	m7027*pop 2	0.221678	0.092192	0.0163
LES	m7027*pop 3	-0.169738	0.0635973	0.0077
LES	m7027*pop 4	0.399265	0.0638379	<0.0001
LES	m7027*pop 5	0.181671	0.0641576	0.0047
LES	m7027*pop 6	0.657795	0.0684588	<0.0001
LES	m7027*pop 7	0.159694	0.0650999	0.0142
LES	m7027*pop 8	0.307509	0.109881	0.0052
LES	m7027*pop 9	0.424149	0.0878044	<0.0001
LES	m7027*pop 11	0.387779	0.0699107	<0.0001
LES	m7027*pop 12	0.46046	0.0941257	<0.0001
LES	m7027*pop 13	0.29652	0.0800297	0.0002
LES	m7027*pop 14	0.376659	0.0609199	<0.0001
LES	m7027*pop 15	0.680221	0.0637018	<0.0001
LES	m7027*pop 16	0.507139	0.0614821	<0.0001
LES	m7027*pop 18	-0.0970892	0.0948693	0.3062
LES	m7027*pop 19	0.338105	0.0976608	0.0005
LES	m7027*pop 20	1.29758	0.0613417	<0.0001
LES	m7027*pop 21	-0.0914903	0.118401	0.4398
LES	m7027*pop 22	0.276734	0.0908146	0.0023
LES	m7027*pop 23	0.295606	0.114359	0.0098
LES	m7027*pop 24	0.231284	0.0998723	0.0206
LES	m7027*pop 25	0.549455	0.0640501	<0.0001
LES	m7027*pop 26	-0.0478417	0.0702909	0.4962
LES	m7229*pop 1	0.0602561	0.0600925	0.3161
LES	m7229*pop 2	-0.0564544	0.0868871	0.5159
LES	m7229*pop 3	0.0868235	0.0603098	0.1501
LES	m7229*pop 4	0.174296	0.0616684	0.0047
LES	m7229*pop 5	-0.0539287	0.0628225	0.3907
LES	m7229*pop 6	0.169816	0.0660972	0.0102
LES	m7229*pop 7	-0.00464564	0.0613958	0.9397
LES	m7229*pop 8	-0.103509	0.118205	0.3813
LES	m7229*pop 9	0.0885608	0.0863924	0.3054
LES	m7229*pop 11	-0.105807	0.0686717	0.1235
LES	m7229*pop 12	-0.152369	0.0907873	0.0934
LES	m7229*pop 13	0.0473858	0.0758487	0.5322
LES	m7229*pop 14	0.152131	0.0569113	0.0076
LES	m7229*pop 15	0.0512658	0.0628704	0.4149
LES	m7229*pop 16	0.220628	0.0617015	0.0004
LES	m7229*pop 18	0.153252	0.0962746	0.1115
LES	m7229*pop 19	0.0527948	0.0893499	0.5547
LES	m7229*pop 20	0.224152	0.0582001	0.0001
LES	m7229*pop 21	0.0757412	0.111035	0.4952
LES	m7229*pop 22	0.0467938	0.095739	0.6251
LES	m7229*pop 23	0.156872	0.101425	0.1221
LES	m7229*pop 24	0.304531	0.10008	0.0024
LES	m7229*pop 25	0.18117	0.065805	0.0059
LES	m7229*pop 26	-0.0230383	0.0640276	0.719
HTR	m197*pop 1	-0.004203	0.00691873	0.5436
HTR	m197*pop 2	-0.029352	0.00981059	0.0028
HTR	m197*pop 3	0.006437	0.00676942	0.3417
HTR	m197*pop 4	-0.0373072	0.00694149	<0.0001
HTR	m197*pop 5	-0.0488464	0.00744449	<0.0001
HTR	m197*pop 6	-0.0358993	0.00767718	<0.0001
HTR	m197*pop 7	-0.0469786	0.00685016	<0.0001
HTR	m197*pop 8	0.0432568	0.0104694	<0.0001
HTR	m197*pop 9	-0.0506202	0.00961129	<0.0001
HTR	m197*pop 11	-0.0742188	0.00787278	<0.0001
HTR	m197*pop 12	0.0129228	0.00981013	0.1879
HTR	m197*pop 13	-0.0430901	0.00846324	<0.0001
HTR	m197*pop 14	-0.0449373	0.00666685	<0.0001
HTR	m197*pop 15	-0.074487	0.00729832	<0.0001
HTR	m197*pop 16	-0.065649	0.00623677	<0.0001
HTR	m197*pop 18	-0.0403946	0.00942414	<0.0001
HTR	m197*pop 19	-0.0330386	0.0112706	0.0034
HTR	m197*pop 20	-0.0434404	0.00649824	<0.0001
HTR	m197*pop 21	-0.018316	0.0117851	0.1203
HTR	m197*pop 22	-0.00115504	0.00984255	0.9066
HTR	m197*pop 23	-0.00616338	0.0114973	0.592
HTR	m197*pop 24	0.05613	0.00947749	<0.0001
HTR	m197*pop 25	-0.0319161	0.00623529	<0.0001
HTR	m197*pop 26	-0.0268854	0.0076959	0.0005
HTR	m416*pop 1	-0.00723268	0.00676211	0.2849
HTR	m416*pop 2	-0.0358154	0.0104082	0.0006
HTR	m416*pop 3	-0.010921	0.00679392	0.1081
HTR	m416*pop 4	-0.00688367	0.00684523	0.3147
HTR	m416*pop 5	-0.013191	0.00775583	0.0891
HTR	m416*pop 6	-0.0196805	0.00735282	0.0075
HTR	m416*pop 7	-0.0231838	0.0070201	0.001
HTR	m416*pop 8	-0.0163777	0.0107205	0.1267
HTR	m416*pop 9	0.00347845	0.0104127	0.7384
HTR	m416*pop 11	0.00484013	0.00749072	0.5182
HTR	m416*pop 12	-0.0292186	0.0097141	0.0027
HTR	m416*pop 13	-0.02163	0.00869092	0.0129
HTR	m416*pop 14	-0.0384867	0.00668672	<0.0001
HTR	m416*pop 15	-0.0163358	0.00741678	0.0277
HTR	m416*pop 16	0.00488713	0.00634189	0.441
HTR	m416*pop 18	-0.0120398	0.00934067	0.1975
HTR	m416*pop 19	-0.0172733	0.0118359	0.1446
HTR	m416*pop 20	-0.0215041	0.00693339	0.0019
HTR	m416*pop 21	-0.0119753	0.0121825	0.3257
HTR	m416*pop 22	-0.0223481	0.00986489	0.0236
HTR	m416*pop 23	-0.00515765	0.0118472	0.6633
HTR	m416*pop 24	-0.00402678	0.0111606	0.7183
HTR	m416*pop 25	-0.0281474	0.00638108	<0.0001
HTR	m416*pop 26	-0.0345554	0.00688829	<0.0001
HTR	m1287*pop 1	0.00364573	0.00663861	0.5829
HTR	m1287*pop 2	0.020789	0.0108348	0.0551
HTR	m1287*pop 3	0.0054907	0.00662267	0.4071
HTR	m1287*pop 4	0.00074191	0.00716714	0.9176
HTR	m1287*pop 5	-0.00914836	0.00711238	0.1985
HTR	m1287*pop 6	0.0029971	0.00719223	0.6769
HTR	m1287*pop 7	0.0140888	0.0072725	0.0528
HTR	m1287*pop 8	0.00879634	0.0108321	0.4168
HTR	m1287*pop 9	0.0207926	0.0104464	0.0466
HTR	m1287*pop 11	0.012654	0.00756802	0.0946
HTR	m1287*pop 12	0.0142645	0.00944232	0.131
HTR	m1287*pop 13	0.00115615	0.00862777	0.8934
HTR	m1287*pop 14	0.0197708	0.0070833	0.0053
HTR	m1287*pop 15	-0.000781772	0.00726448	0.9143
HTR	m1287*pop 16	0.0275434	0.00671193	<0.0001
HTR	m1287*pop 18	0.000615209	0.0108599	0.9548
HTR	m1287*pop 19	0.00767607	0.0101895	0.4513
HTR	m1287*pop 20	0.0204431	0.00675993	0.0025
HTR	m1287*pop 21	0.0240528	0.0116173	0.0385
HTR	m1287*pop 22	0.020758	0.00962064	0.031
HTR	m1287*pop 23	0.0102533	0.0111715	0.3588
HTR	m1287*pop 24	0.024407	0.0113624	0.0318
HTR	m1287*pop 25	0.01852	0.00644102	0.0041
HTR	m1287*pop 26	0.0106503	0.00773734	0.1688
HTR	m1495*pop 1	0.00671973	0.00851462	0.4301
HTR	m1495*pop 2	0.00773774	0.0126218	0.5399
HTR	m1495*pop 3	0.0213931	0.00717399	0.0029
HTR	m1495*pop 4	0.0245933	0.00899604	0.0063
HTR	m1495*pop 5	0.0259331	0.00745384	0.0005
HTR	m1495*pop 6	0.00597752	0.00777086	0.4418
HTR	m1495*pop 7	0.0129667	0.00755969	0.0864
HTR	m1495*pop 8	-0.00940546	0.0116738	0.4205
HTR	m1495*pop 9	0.00125044	0.0105374	0.9055
HTR	m1495*pop 11	-0.0315123	0.00925538	0.0007
HTR	m1495*pop 12	0.0290551	0.0108235	0.0073
HTR	m1495*pop 13	0.00759204	0.00821078	0.3552
HTR	m1495*pop 14	-0.0168471	0.00857697	0.0496
HTR	m1495*pop 15	-0.0168627	0.00946668	0.075
HTR	m1495*pop 16	-0.00676438	0.00835079	0.418
HTR	m1495*pop 18	-0.014332	0.013941	0.304
HTR	m1495*pop 19	0.0116628	0.0156684	0.4567
HTR	m1495*pop 20	0.0186115	0.00694428	0.0074
HTR	m1495*pop 21	0.0126659	0.0119261	0.2883
HTR	m1495*pop 22	0.0119164	0.0119201	0.3176
HTR	m1495*pop 23	0.00241526	0.0131723	0.8545
HTR	m1495*pop 24	-0.0296195	0.0139902	0.0343
HTR	m1495*pop 25	-0.00164315	0.00726468	0.8211
HTR	m1495*pop 26	0.000206556	0.00938348	0.9824
HTR	m1582*pop 1	0.00255947	0.00860173	0.7661
HTR	m1582*pop 2	-0.0118203	0.0125656	0.3469
HTR	m1582*pop 3	-0.00122579	0.00713026	0.8635
HTR	m1582*pop 4	-0.0127992	0.00851949	0.1331
HTR	m1582*pop 5	-0.0135983	0.00721594	0.0596
HTR	m1582*pop 6	-0.00516993	0.00761054	0.497
HTR	m1582*pop 7	0.00353531	0.0073411	0.6301
HTR	m1582*pop 8	-0.0220849	0.0116633	0.0584
HTR	m1582*pop 9	-0.0151046	0.0103296	0.1438
HTR	m1582*pop 11	-0.000642041	0.00898553	0.943
HTR	m1582*pop 12	0.00451327	0.0108056	0.6762
HTR	m1582*pop 13	0.00252766	0.00801199	0.7524
HTR	m1582*pop 14	-0.00721758	0.00827022	0.3829
HTR	m1582*pop 15	0.00367471	0.00912016	0.687
HTR	m1582*pop 16	-0.0410095	0.0080526	<0.0001
HTR	m1582*pop 18	0.0187097	0.0127196	0.1414
HTR	m1582*pop 19	-0.0181981	0.0152722	0.2335
HTR	m1582*pop 20	-0.0412696	0.00678803	<0.0001
HTR	m1582*pop 21	-0.00272738	0.0127291	0.8304
HTR	m1582*pop 22	-0.00368224	0.0106172	0.7288
HTR	m1582*pop 23	0.00190272	0.01179	0.8718
HTR	m1582*pop 24	0.0114238	0.0123925	0.3567
HTR	m1582*pop 25	-0.0209291	0.00708616	0.0032
HTR	m1582*pop 26	-0.0138304	0.00951962	0.1464
HTR	m2187*pop 1	-0.0123668	0.00655703	0.0594
HTR	m2187*pop 2	-0.0220726	0.00938864	0.0188
HTR	m2187*pop 3	-0.0104788	0.00683869	0.1256
HTR	m2187*pop 4	-0.00898247	0.0066901	0.1795
HTR	m2187*pop 5	-0.0313236	0.00725528	<0.0001
HTR	m2187*pop 6	-0.0274882	0.00677324	<0.0001
HTR	m2187*pop 7	-0.00827724	0.00676726	0.2214
HTR	m2187*pop 8	0.00475855	0.0113974	0.6763
HTR	m2187*pop 9	-0.0371598	0.00981055	0.0002
HTR	m2187*pop 11	-0.0136787	0.00736015	0.0632
HTR	m2187*pop 12	-0.018723	0.0103007	0.0692
HTR	m2187*pop 13	-0.0326344	0.00821344	<0.0001
HTR	m2187*pop 14	-0.014255	0.00635751	0.025
HTR	m2187*pop 15	-0.0345085	0.00749003	<0.0001
HTR	m2187*pop 16	-0.0193272	0.00639427	0.0025
HTR	m2187*pop 18	-0.0172095	0.0103308	0.0959
HTR	m2187*pop 19	-0.00739919	0.00925925	0.4243
HTR	m2187*pop 20	-0.0418971	0.00671976	<0.0001
HTR	m2187*pop 21	-0.0209421	0.0104632	0.0454
HTR	m2187*pop 22	-0.0111648	0.00975715	0.2526
HTR	m2187*pop 23	-0.0158375	0.0103578	0.1264
HTR	m2187*pop 24	-0.0222268	0.0103407	0.0317
HTR	m2187*pop 25	-0.0181559	0.00640518	0.0046
HTR	m2187*pop 26	-0.00920172	0.00700481	0.1891
HTR	m2978*pop 1	0.00112948	0.00674723	0.8671
HTR	m2978*pop 2	0.00853073	0.010228	0.4043
HTR	m2978*pop 3	0.00294546	0.00679991	0.6649
HTR	m2978*pop 4	-6.84064e-05	0.00728502	0.9925
HTR	m2978*pop 5	-0.0206481	0.00702976	0.0033
HTR	m2978*pop 6	-0.0121263	0.00728089	0.0959
HTR	m2978*pop 7	0.00323706	0.00713966	0.6503
HTR	m2978*pop 8	-0.00927004	0.0110729	0.4026
HTR	m2978*pop 9	-0.0141467	0.00969173	0.1445
HTR	m2978*pop 11	-0.032243	0.0101033	0.0014
HTR	m2978*pop 12	-0.0357372	0.0088644	<0.0001
HTR	m2978*pop 13	-0.00967417	0.00808464	0.2316
HTR	m2978*pop 14	-0.0171927	0.00656239	0.0088
HTR	m2978*pop 15	-0.0128856	0.00754065	0.0876
HTR	m2978*pop 16	-0.0415265	0.00647585	<0.0001
HTR	m2978*pop 18	-0.00214771	0.0100832	0.8313
HTR	m2978*pop 19	-0.00968219	0.0108947	0.3742
HTR	m2978*pop 20	-0.0159701	0.00640771	0.0128
HTR	m2978*pop 21	-0.0230095	0.0120432	0.0562
HTR	m2978*pop 22	0.0123743	0.0104354	0.2358
HTR	m2978*pop 23	-0.00461803	0.0123698	0.7089
HTR	m2978*pop 24	-0.0350335	0.0103468	0.0007
HTR	m2978*pop 25	-0.0131633	0.00662843	0.0471
HTR	m2978*pop 26	-0.00464441	0.00689346	0.5005
HTR	m3207*pop 1	0.00608247	0.00676756	0.3689
HTR	m3207*pop 2	-0.00615049	0.0102767	0.5496
HTR	m3207*pop 3	-0.0132475	0.00675297	0.0499
HTR	m3207*pop 4	0.00386589	0.00700003	0.5808
HTR	m3207*pop 5	0.00172272	0.00716315	0.81
HTR	m3207*pop 6	-0.0151613	0.00713783	0.0338
HTR	m3207*pop 7	0.00859455	0.00739125	0.245
HTR	m3207*pop 8	-0.0134143	0.0102191	0.1894
HTR	m3207*pop 9	0.0107157	0.00966185	0.2675
HTR	m3207*pop 11	0.0166234	0.00781442	0.0335
HTR	m3207*pop 12	-0.0114213	0.0095968	0.2341
HTR	m3207*pop 13	-0.0147244	0.00842184	0.0805
HTR	m3207*pop 14	0.00303316	0.00625959	0.628
HTR	m3207*pop 15	0.0250986	0.00764433	0.001
HTR	m3207*pop 16	0.0100678	0.00658878	0.1266
HTR	m3207*pop 18	-0.000114351	0.0100436	0.9909
HTR	m3207*pop 19	0.00787106	0.0105776	0.4569
HTR	m3207*pop 20	-0.0131256	0.00643259	0.0414
HTR	m3207*pop 21	-0.032761	0.0104674	0.0018
HTR	m3207*pop 22	0.0185185	0.0104917	0.0777
HTR	m3207*pop 23	-0.00499975	0.011642	0.6676
HTR	m3207*pop 24	0.0195519	0.0102987	0.0577
HTR	m3207*pop 25	0.0320271	0.00634111	<0.0001
HTR	m3207*pop 26	-0.0349706	0.00713595	<0.0001
HTR	m3509*pop 1	-0.0131179	0.00665831	0.0489
HTR	m3509*pop 2	-0.0113846	0.00989558	0.2501
HTR	m3509*pop 3	-0.019733	0.00643885	0.0022
HTR	m3509*pop 4	-0.00144928	0.00669138	0.8285
HTR	m3509*pop 5	-0.0287998	0.0070366	<0.0001
HTR	m3509*pop 6	-0.00898957	0.00714731	0.2086
HTR	m3509*pop 7	-0.0198369	0.00704857	0.0049
HTR	m3509*pop 8	-0.00841821	0.0102744	0.4127
HTR	m3509*pop 9	-0.012647	0.00942799	0.1799
HTR	m3509*pop 11	-0.0242976	0.0074383	0.0011
HTR	m3509*pop 12	-0.0233921	0.00913838	0.0105
HTR	m3509*pop 13	-0.0160697	0.00812166	0.048
HTR	m3509*pop 14	-0.0327701	0.00629262	<0.0001
HTR	m3509*pop 15	-0.0195117	0.00710304	0.0061
HTR	m3509*pop 16	-0.0424615	0.00629	<0.0001
HTR	m3509*pop 18	-0.0171462	0.00937366	0.0675
HTR	m3509*pop 19	-0.0115921	0.00974875	0.2345
HTR	m3509*pop 20	-0.0326306	0.00652948	<0.0001
HTR	m3509*pop 21	-0.0177358	0.0103647	0.0872
HTR	m3509*pop 22	-0.0270971	0.00934256	0.0038
HTR	m3509*pop 23	-0.0188487	0.0107056	0.0784
HTR	m3509*pop 24	-0.0236035	0.0101902	0.0206
HTR	m3509*pop 25	0.00343841	0.00634988	0.5882
HTR	m3509*pop 26	-0.0140461	0.00717186	0.0503
HTR	m3797*pop 1	-0.00284119	0.0063385	0.654
HTR	m3797*pop 2	0.00802138	0.00985201	0.4156
HTR	m3797*pop 3	0.0030492	0.00673768	0.6509
HTR	m3797*pop 4	-0.00796342	0.00697371	0.2536
HTR	m3797*pop 5	0.0055598	0.00719465	0.4397
HTR	m3797*pop 6	-0.010754	0.00700834	0.125
HTR	m3797*pop 7	0.0062114	0.00711188	0.3825
HTR	m3797*pop 8	-0.0238535	0.010132	0.0186
HTR	m3797*pop 9	-0.0159992	0.00956981	0.0947
HTR	m3797*pop 11	0.0201507	0.00787823	0.0106
HTR	m3797*pop 12	-0.00464662	0.00919195	0.6132
HTR	m3797*pop 13	-0.00862039	0.00818166	0.2922
HTR	m3797*pop 14	-0.011656	0.00667624	0.0809
HTR	m3797*pop 15	-0.051333	0.00719477	<0.0001
HTR	m3797*pop 16	-0.0321039	0.00631588	<0.0001
HTR	m3797*pop 18	-0.0093168	0.00969208	0.3365
HTR	m3797*pop 19	-0.00292676	0.00941568	0.7559
HTR	m3797*pop 20	-0.02811	0.00650225	<0.0001
HTR	m3797*pop 21	-0.000286729	0.0101284	0.9774
HTR	m3797*pop 22	-0.00250408	0.00956682	0.7935
HTR	m3797*pop 23	-0.00746873	0.0103468	0.4705
HTR	m3797*pop 24	0.00214097	0.0107914	0.8428
HTR	m3797*pop 25	-0.0475789	0.00659462	<0.0001
HTR	m3797*pop 26	-0.0113652	0.00743918	0.1267
HTR	m4216*pop 1	-0.00673929	0.00642166	0.2941
HTR	m4216*pop 2	-0.00783773	0.00966935	0.4177
HTR	m4216*pop 3	-0.0139101	0.00646579	0.0315
HTR	m4216*pop 4	-0.00885	0.00665152	0.1835
HTR	m4216*pop 5	-0.00865543	0.00686875	0.2077
HTR	m4216*pop 6	0.00477133	0.00718633	0.5068
HTR	m4216*pop 7	-0.00359104	0.00677876	0.5963
HTR	m4216*pop 8	-0.0274208	0.0111669	0.0141
HTR	m4216*pop 9	-0.031283	0.00951822	0.001
HTR	m4216*pop 11	0.00887033	0.00747128	0.2352
HTR	m4216*pop 12	-0.0129011	0.0103573	0.213
HTR	m4216*pop 13	-0.0127663	0.00779615	0.1016
HTR	m4216*pop 14	-0.024901	0.00620938	<0.0001
HTR	m4216*pop 15	-0.0122195	0.00706939	0.084
HTR	m4216*pop 16	-0.0105196	0.00626619	0.0933
HTR	m4216*pop 18	-0.00936435	0.00983676	0.3412
HTR	m4216*pop 19	-0.01204	0.00962995	0.2113
HTR	m4216*pop 20	-0.00411413	0.00681468	0.5461
HTR	m4216*pop 21	-0.0111864	0.0117036	0.3393
HTR	m4216*pop 22	-0.00597983	0.00926137	0.5185
HTR	m4216*pop 23	-0.00761471	0.0103356	0.4613
HTR	m4216*pop 24	-0.0173606	0.0106572	0.1034
HTR	m4216*pop 25	-0.0179242	0.00643872	0.0054
HTR	m4216*pop 26	-0.00298591	0.00705545	0.6722
HTR	m4468*pop 1	-0.00875724	0.00645492	0.175
HTR	m4468*pop 2	-0.00136695	0.0108083	0.8994
HTR	m4468*pop 3	-0.00692086	0.0065646	0.2919
HTR	m4468*pop 4	-0.0123055	0.00654621	0.0602
HTR	m4468*pop 5	-0.0175735	0.00706456	0.0129
HTR	m4468*pop 6	-0.0120471	0.00699517	0.0851
HTR	m4468*pop 7	-0.00780916	0.00691357	0.2588
HTR	m4468*pop 8	-0.00660477	0.0105321	0.5306
HTR	m4468*pop 9	-0.0206593	0.0101449	0.0418
HTR	m4468*pop 11	-0.0127562	0.0072757	0.0797
HTR	m4468*pop 12	0.0137721	0.0100337	0.17
HTR	m4468*pop 13	-0.0200037	0.00812901	0.0139
HTR	m4468*pop 14	-0.0300354	0.0064624	<0.0001
HTR	m4468*pop 15	-0.02449	0.00704983	0.0005
HTR	m4468*pop 16	-0.0394142	0.00645447	<0.0001
HTR	m4468*pop 18	-0.0412588	0.00969585	<0.0001
HTR	m4468*pop 19	0.00818482	0.0109436	0.4546
HTR	m4468*pop 20	-0.0242447	0.00677719	0.0004
HTR	m4468*pop 21	-0.0135695	0.0111493	0.2237
HTR	m4468*pop 22	-0.0115562	0.00936633	0.2174
HTR	m4468*pop 23	-0.0173778	0.0120745	0.1502
HTR	m4468*pop 24	-0.0031088	0.00957335	0.7454
HTR	m4468*pop 25	-0.0108741	0.00667085	0.1032
HTR	m4468*pop 26	-0.0102468	0.00703965	0.1456
HTR	m4994*pop 1	0.00654712	0.00650126	0.314
HTR	m4994*pop 2	-0.00716153	0.0100452	0.476
HTR	m4994*pop 3	0.00076448	0.00653356	0.9069
HTR	m4994*pop 4	0.00674831	0.00697231	0.3332
HTR	m4994*pop 5	0.00178058	0.00674971	0.792
HTR	m4994*pop 6	-0.00157719	0.00717997	0.8261
HTR	m4994*pop 7	0.00188098	0.00679204	0.7818
HTR	m4994*pop 8	-0.00764566	0.0113624	0.5011
HTR	m4994*pop 9	-0.0322121	0.0093169	0.0006
HTR	m4994*pop 11	0.00726274	0.00735198	0.3233
HTR	m4994*pop 12	-0.0123868	0.00883845	0.1612
HTR	m4994*pop 13	-0.0252888	0.00878052	0.004
HTR	m4994*pop 14	0.0107723	0.00642541	0.0938
HTR	m4994*pop 15	0.0286797	0.00677521	<0.0001
HTR	m4994*pop 16	-0.00494264	0.00632874	0.4349
HTR	m4994*pop 18	0.0220379	0.00898137	0.0142
HTR	m4994*pop 19	-0.00239043	0.0102064	0.8148
HTR	m4994*pop 20	0.00717577	0.00643077	0.2646
HTR	m4994*pop 21	-0.0167719	0.0102897	0.1032
HTR	m4994*pop 22	-0.00115431	0.00991133	0.9073
HTR	m4994*pop 23	0.0195129	0.0110219	0.0768
HTR	m4994*pop 24	0.0261712	0.0115692	0.0238
HTR	m4994*pop 25	0.00509883	0.00663251	0.4421
HTR	m4994*pop 26	-0.00351349	0.00694903	0.6132
HTR	m5872*pop 1	0.00479568	0.00656394	0.4651
HTR	m5872*pop 2	-0.00329944	0.00999552	0.7414
HTR	m5872*pop 3	-0.00652064	0.00660114	0.3233
HTR	m5872*pop 4	0.00160058	0.00707953	0.8212
HTR	m5872*pop 5	-0.0167883	0.00660241	0.0111
HTR	m5872*pop 6	-0.0210264	0.00693559	0.0025
HTR	m5872*pop 7	0.00246726	0.00681926	0.7175
HTR	m5872*pop 8	-0.00921393	0.0107656	0.3921
HTR	m5872*pop 9	-0.0276639	0.0102843	0.0072
HTR	m5872*pop 11	0.00448252	0.00745005	0.5474
HTR	m5872*pop 12	-0.00460828	0.00908213	0.6119
HTR	m5872*pop 13	-0.011185	0.00797719	0.161
HTR	m5872*pop 14	0.00462963	0.00663628	0.4855
HTR	m5872*pop 15	-0.0120389	0.00693755	0.0828
HTR	m5872*pop 16	-0.0304571	0.00619125	<0.0001
HTR	m5872*pop 18	0.0205319	0.00953922	0.0315
HTR	m5872*pop 19	-0.0107172	0.0108697	0.3242
HTR	m5872*pop 20	-0.0251807	0.00645788	<0.0001
HTR	m5872*pop 21	0.0187256	0.0105548	0.0762
HTR	m5872*pop 22	0.0172447	0.00975323	0.0772
HTR	m5872*pop 23	0.012152	0.0103351	0.2398
HTR	m5872*pop 24	-0.0133029	0.0101082	0.1883
HTR	m5872*pop 25	-0.00820172	0.00646897	0.205
HTR	m5872*pop 26	0.0161604	0.00699014	0.0209
HTR	m6354*pop 1	0.0184295	0.00796967	0.0208
HTR	m6354*pop 2	0.0275187	0.011649	0.0182
HTR	m6354*pop 3	0.0247679	0.00764936	0.0012
HTR	m6354*pop 4	0.027158	0.00741248	0.0003
HTR	m6354*pop 5	0.00480147	0.00794382	0.5456
HTR	m6354*pop 6	0.0292169	0.00840553	0.0005
HTR	m6354*pop 7	0.0508524	0.0080386	<0.0001
HTR	m6354*pop 8	0.0248525	0.01218	0.0414
HTR	m6354*pop 9	0.0245691	0.0121819	0.0438
HTR	m6354*pop 11	0.00562137	0.00883105	0.5245
HTR	m6354*pop 12	0.0403724	0.0141039	0.0042
HTR	m6354*pop 13	0.0458998	0.00966991	<0.0001
HTR	m6354*pop 14	0.0174071	0.00746658	0.0198
HTR	m6354*pop 15	0.0151216	0.00810055	0.062
HTR	m6354*pop 16	0.0444952	0.00762738	<0.0001
HTR	m6354*pop 18	0.0313802	0.00974437	0.0013
HTR	m6354*pop 19	0.0149593	0.0136189	0.2721
HTR	m6354*pop 20	0.0456422	0.0074029	<0.0001
HTR	m6354*pop 21	0.0231136	0.0117101	0.0485
HTR	m6354*pop 22	0.00167858	0.013121	0.8982
HTR	m6354*pop 23	0.0159699	0.0124016	0.198
HTR	m6354*pop 24	0.0133051	0.0123471	0.2813
HTR	m6354*pop 25	0.0147284	0.00802908	0.0667
HTR	m6354*pop 26	0.0254605	0.00821468	0.002
HTR	m6444*pop 1	0.0121579	0.00786418	0.1222
HTR	m6444*pop 2	-0.0343085	0.0127415	0.0071
HTR	m6444*pop 3	0.00577162	0.00770896	0.4541
HTR	m6444*pop 4	-0.00130679	0.00685472	0.8488
HTR	m6444*pop 5	0.00746254	0.0078074	0.3392
HTR	m6444*pop 6	0.00868779	0.00844373	0.3036
HTR	m6444*pop 7	0.00845423	0.0079363	0.2869
HTR	m6444*pop 8	-0.00868438	0.0116994	0.458
HTR	m6444*pop 9	0.0219587	0.0123185	0.0748
HTR	m6444*pop 11	-0.0332505	0.00917779	0.0003
HTR	m6444*pop 12	-0.0158233	0.01385	0.2534
HTR	m6444*pop 13	-0.0572862	0.00931084	<0.0001
HTR	m6444*pop 14	-0.0102601	0.0074192	0.1668
HTR	m6444*pop 15	-0.0114127	0.00846911	0.1779
HTR	m6444*pop 16	-0.00301598	0.00776357	0.6977
HTR	m6444*pop 18	-0.000159428	0.0108276	0.9883
HTR	m6444*pop 19	0.0128717	0.0117333	0.2727
HTR	m6444*pop 20	-0.0744725	0.00744099	<0.0001
HTR	m6444*pop 21	0.0187376	0.0111284	0.0923
HTR	m6444*pop 22	-0.012656	0.0123051	0.3038
HTR	m6444*pop 23	-0.0166798	0.0116029	0.1507
HTR	m6444*pop 24	-0.0317228	0.0134909	0.0188
HTR	m6444*pop 25	-0.031596	0.00792039	<0.0001
HTR	m6444*pop 26	0.000943862	0.00782385	0.904
HTR	m6875*pop 1	0.00129016	0.00691252	0.852
HTR	m6875*pop 2	0.0319254	0.0111535	0.0042
HTR	m6875*pop 3	0.00512601	0.00666122	0.4416
HTR	m6875*pop 4	0.0242783	0.00733264	0.0009
HTR	m6875*pop 5	0.0131752	0.00707847	0.0628
HTR	m6875*pop 6	0.0207138	0.00731421	0.0047
HTR	m6875*pop 7	-0.0384697	0.00730601	<0.0001
HTR	m6875*pop 8	0.0350685	0.0117219	0.0028
HTR	m6875*pop 9	0.0348101	0.00965498	0.0003
HTR	m6875*pop 11	0.0268756	0.00802283	0.0008
HTR	m6875*pop 12	0.0186511	0.00989895	0.0597
HTR	m6875*pop 13	0.0196402	0.00826273	0.0175
HTR	m6875*pop 14	0.0179136	0.00659403	0.0066
HTR	m6875*pop 15	0.0304613	0.0069398	<0.0001
HTR	m6875*pop 16	0.0103166	0.00647217	0.1111
HTR	m6875*pop 18	0.0228794	0.010007	0.0223
HTR	m6875*pop 19	0.0184088	0.0104746	0.079
HTR	m6875*pop 20	-0.0278032	0.0068164	<0.0001
HTR	m6875*pop 21	0.0049264	0.0115794	0.6705
HTR	m6875*pop 22	0.0146291	0.00998279	0.1429
HTR	m6875*pop 23	-0.00251253	0.0113103	0.8242
HTR	m6875*pop 24	0.0103268	0.0118451	0.3834
HTR	m6875*pop 25	0.0433569	0.00716476	<0.0001
HTR	m6875*pop 26	0.00493239	0.00769822	0.5218
HTR	m7025*pop 1	-0.0186559	0.00693611	0.0072
HTR	m7025*pop 2	-0.0216162	0.0102621	0.0353
HTR	m7025*pop 3	0.00491101	0.00739304	0.5066
HTR	m7025*pop 4	-0.0398443	0.00707803	<0.0001
HTR	m7025*pop 5	-0.0173782	0.00716546	0.0154
HTR	m7025*pop 6	-0.074828	0.00774268	<0.0001
HTR	m7025*pop 7	-0.0094339	0.00698855	0.1772
HTR	m7025*pop 8	-0.0154156	0.0120301	0.2002
HTR	m7025*pop 9	-0.0530938	0.00974827	<0.0001
HTR	m7025*pop 11	-0.0415849	0.0075983	<0.0001
HTR	m7025*pop 12	-0.0462229	0.0101037	<0.0001
HTR	m7025*pop 13	-0.0151675	0.0088249	0.0858
HTR	m7025*pop 14	-0.0315902	0.00684446	<0.0001
HTR	m7025*pop 15	-0.0504944	0.00702603	<0.0001
HTR	m7025*pop 16	-0.0643654	0.00668005	<0.0001
HTR	m7025*pop 18	0.0148481	0.0104735	0.1564
HTR	m7025*pop 19	-0.0368211	0.0105828	0.0005
HTR	m7025*pop 20	-0.113507	0.0067147	<0.0001
HTR	m7025*pop 21	-0.00434507	0.0128396	0.7351
HTR	m7025*pop 22	-0.0234916	0.0099771	0.0186
HTR	m7025*pop 23	-0.0262378	0.0127808	0.0402
HTR	m7025*pop 24	-0.00804202	0.0104302	0.4408
HTR	m7025*pop 25	-0.0384544	0.00709697	<0.0001
HTR	m7025*pop 26	0.00956476	0.00765037	0.2113
HTR	m7229*pop 1	-0.00677052	0.00659891	0.305
HTR	m7229*pop 2	0.00199343	0.00979971	0.8388
HTR	m7229*pop 3	-0.00810667	0.00668524	0.2254
HTR	m7229*pop 4	-0.0290016	0.00677395	<0.0001
HTR	m7229*pop 5	0.00917076	0.00707979	0.1953
HTR	m7229*pop 6	-0.0116127	0.00728409	0.111
HTR	m7229*pop 7	-0.00675669	0.00675267	0.3171
HTR	m7229*pop 8	-0.00948688	0.0122406	0.4384
HTR	m7229*pop 9	-0.000197441	0.00958195	0.9836
HTR	m7229*pop 11	0.00935065	0.00728638	0.1995
HTR	m7229*pop 12	0.0044805	0.0100509	0.6558
HTR	m7229*pop 13	-0.0134897	0.0083843	0.1078
HTR	m7229*pop 14	-0.0108879	0.00623039	0.0807
HTR	m7229*pop 15	-0.0239583	0.00697667	0.0006
HTR	m7229*pop 16	-0.0377921	0.00672282	<0.0001
HTR	m7229*pop 18	-0.0189992	0.0098652	0.0542
HTR	m7229*pop 19	0.00193924	0.00932311	0.8352
HTR	m7229*pop 20	-0.0230323	0.00653032	0.0004
HTR	m7229*pop 21	0.00201081	0.0123755	0.8709
HTR	m7229*pop 22	-0.00219319	0.0100452	0.8272
HTR	m7229*pop 23	-0.00803649	0.0111546	0.4713
HTR	m7229*pop 24	-0.0146373	0.0106683	0.1702
HTR	m7229*pop 25	-0.00844364	0.00713958	0.2371
HTR	m7229*pop 26	-0.0202729	0.00689031	0.0033
SWR	m198*pop 1	0.00505008	0.00565096	0.3716
SWR	m198*pop 2	-0.0236762	0.00803674	0.0032
SWR	m198*pop 3	0.00602138	0.00559591	0.282
SWR	m198*pop 4	-0.0396197	0.00592508	<0.0001
SWR	m198*pop 5	-0.0377428	0.00615856	<0.0001
SWR	m198*pop 6	-0.0195614	0.0061146	0.0014
SWR	m198*pop 7	-0.0365163	0.00575397	<0.0001
SWR	m198*pop 8	0.0259051	0.00829162	0.0018
SWR	m198*pop 9	-0.0193585	0.00817586	0.018
SWR	m198*pop 11	-0.0423594	0.00646176	<0.0001
SWR	m198*pop 12	0.0182507	0.00843008	0.0305
SWR	m198*pop 13	-0.0324423	0.00675935	<0.0001
SWR	m198*pop 14	-0.0251787	0.00543451	<0.0001
SWR	m198*pop 15	-0.0497053	0.00581536	<0.0001
SWR	m198*pop 16	-0.0339307	0.00509689	<0.0001
SWR	m198*pop 18	-0.0244242	0.00768268	0.0015
SWR	m198*pop 19	-0.0339708	0.00968178	0.0005
SWR	m198*pop 20	-0.0196569	0.0053918	0.0003
SWR	m198*pop 21	-0.0251006	0.00923438	0.0066
SWR	m198*pop 22	-0.000419304	0.00822321	0.9593
SWR	m198*pop 23	0.0216975	0.00876001	0.0133
SWR	m198*pop 24	0.0628287	0.00786259	<0.0001
SWR	m198*pop 25	-0.0170904	0.00506846	0.0008
SWR	m198*pop 26	-0.0324513	0.00627268	<0.0001
SWR	m413*pop 1	-0.0125785	0.00554564	0.0234
SWR	m413*pop 2	-0.0314268	0.00877585	0.0003
SWR	m413*pop 3	-0.00660175	0.00549568	0.2298
SWR	m413*pop 4	0.0072653	0.00558915	0.1938
SWR	m413*pop 5	-0.000337993	0.00631473	0.9573
SWR	m413*pop 6	-0.0171102	0.00598969	0.0043
SWR	m413*pop 7	-0.0143522	0.00580752	0.0135
SWR	m413*pop 8	-0.0144664	0.00870043	0.0965
SWR	m413*pop 9	0.00079557	0.00953599	0.9335
SWR	m413*pop 11	-0.00825514	0.00616257	0.1805
SWR	m413*pop 12	-0.0291303	0.0079001	0.0002
SWR	m413*pop 13	-0.0041023	0.00672109	0.5417
SWR	m413*pop 14	-0.0123924	0.00558661	0.0266
SWR	m413*pop 15	-0.0135514	0.00599375	0.0238
SWR	m413*pop 16	0.00486	0.00529748	0.359
SWR	m413*pop 18	-0.00443097	0.00786981	0.5735
SWR	m413*pop 19	-0.0120847	0.0099621	0.2252
SWR	m413*pop 20	-0.0143668	0.00570268	0.0118
SWR	m413*pop 21	0.00475909	0.00987282	0.6298
SWR	m413*pop 22	-0.0118067	0.00816454	0.1483
SWR	m413*pop 23	0.00117115	0.0104907	0.9111
SWR	m413*pop 24	0.00492846	0.0093138	0.5967
SWR	m413*pop 25	-0.0120959	0.00528015	0.0221
SWR	m413*pop 26	-0.00997359	0.00554225	0.072
SWR	m716*pop 1	-0.00416209	0.00519599	0.4232
SWR	m716*pop 2	0.00804508	0.00788936	0.3079
SWR	m716*pop 3	0.000689198	0.00516805	0.8939
SWR	m716*pop 4	0.0107539	0.00548616	0.0501
SWR	m716*pop 5	0.00208535	0.00560057	0.7097
SWR	m716*pop 6	0.00253255	0.00557178	0.6495
SWR	m716*pop 7	0.0114556	0.00546352	0.0361
SWR	m716*pop 8	0.0410622	0.0108964	0.0002
SWR	m716*pop 9	0.0151136	0.0081609	0.0641
SWR	m716*pop 11	-0.00204518	0.00631386	0.746
SWR	m716*pop 12	-0.00499843	0.00756429	0.5088
SWR	m716*pop 13	-0.00992674	0.00679849	0.1444
SWR	m716*pop 14	-0.00719736	0.00551498	0.192
SWR	m716*pop 15	0.0128184	0.00575264	0.026
SWR	m716*pop 16	0.00146729	0.00518619	0.7773
SWR	m716*pop 18	-0.00979548	0.00867318	0.2588
SWR	m716*pop 19	0.0103844	0.00792833	0.1904
SWR	m716*pop 20	-0.00350828	0.00543411	0.5186
SWR	m716*pop 21	0.0215261	0.010543	0.0413
SWR	m716*pop 22	-0.0204686	0.00816092	0.0122
SWR	m716*pop 23	0.00908699	0.00855179	0.2881
SWR	m716*pop 24	0.0097784	0.00888339	0.2711
SWR	m716*pop 25	-0.00123685	0.00535834	0.8175
SWR	m716*pop 26	0.00302979	0.00561831	0.5897
SWR	m1287*pop 1	0.00119844	0.00558163	0.83
SWR	m1287*pop 2	0.0148101	0.00914262	0.1054
SWR	m1287*pop 3	0.00483045	0.00556452	0.3854
SWR	m1287*pop 4	0.00223838	0.00598042	0.7082
SWR	m1287*pop 5	0.0014108	0.00582421	0.8086
SWR	m1287*pop 6	0.0141405	0.00593246	0.0172
SWR	m1287*pop 7	0.00794441	0.00612332	0.1946
SWR	m1287*pop 8	0.0145935	0.008864	0.0998
SWR	m1287*pop 9	0.0321019	0.00871683	0.0002
SWR	m1287*pop 11	0.00639369	0.00615578	0.2991
SWR	m1287*pop 12	0.000684967	0.00784287	0.9304
SWR	m1287*pop 13	0.0044641	0.00680111	0.5116
SWR	m1287*pop 14	0.00755693	0.00601937	0.2094
SWR	m1287*pop 15	0.00220424	0.00628936	0.726
SWR	m1287*pop 16	0.0188754	0.00555793	0.0007
SWR	m1287*pop 18	0.000319148	0.00864053	0.9705
SWR	m1287*pop 19	0.00110744	0.00866288	0.8983
SWR	m1287*pop 20	0.00388645	0.00552768	0.4821
SWR	m1287*pop 21	0.0134635	0.00983135	0.171
SWR	m1287*pop 22	0.0215208	0.00812511	0.0081
SWR	m1287*pop 23	0.00642451	0.0087008	0.4604
SWR	m1287*pop 24	0.0084618	0.00923944	0.3598
SWR	m1287*pop 25	0.015527	0.00532388	0.0036
SWR	m1287*pop 26	0.00959981	0.00629069	0.1271
SWR	m1465*pop 1	0.0124208	0.0060748	0.041
SWR	m1465*pop 2	0.017908	0.0106034	0.0914
SWR	m1465*pop 3	0.0153174	0.00585726	0.009
SWR	m1465*pop 4	0.0301495	0.00736723	<0.0001
SWR	m1465*pop 5	0.019169	0.00580169	0.001
SWR	m1465*pop 6	0.00618965	0.0060793	0.3087
SWR	m1465*pop 7	0.0157581	0.00626041	0.0119
SWR	m1465*pop 8	-0.0249577	0.0098396	0.0113
SWR	m1465*pop 9	0.009324	0.00891564	0.2958
SWR	m1465*pop 11	-0.00453489	0.00688699	0.5103
SWR	m1465*pop 12	0.0292138	0.00905899	0.0013
SWR	m1465*pop 13	0.0134249	0.00655972	0.0408
SWR	m1465*pop 14	-0.0043997	0.00669255	0.511
SWR	m1465*pop 15	-0.00233438	0.00726965	0.7482
SWR	m1465*pop 16	-0.00993472	0.00673825	0.1405
SWR	m1465*pop 18	0.0101197	0.0111074	0.3623
SWR	m1465*pop 19	0.0315202	0.011197	0.0049
SWR	m1465*pop 20	0.0182102	0.0057772	0.0016
SWR	m1465*pop 21	0.00884593	0.00925345	0.3392
SWR	m1465*pop 22	-0.00813349	0.00853098	0.3405
SWR	m1465*pop 23	0.00634489	0.0109115	0.561
SWR	m1465*pop 24	-0.0245794	0.00969006	0.0113
SWR	m1465*pop 25	0.0109853	0.00589328	0.0624
SWR	m1465*pop 26	0.00388612	0.00731924	0.5955
SWR	m1569*pop 1	0.0102742	0.00632871	0.1046
SWR	m1569*pop 2	-0.0121295	0.0104533	0.246
SWR	m1569*pop 3	-0.0033417	0.00565479	0.5546
SWR	m1569*pop 4	-0.0140488	0.00693507	0.0429
SWR	m1569*pop 5	0.00188781	0.00563418	0.7376
SWR	m1569*pop 6	-0.000485985	0.00573596	0.9325
SWR	m1569*pop 7	0.0109465	0.00595849	0.0663
SWR	m1569*pop 8	-0.0125548	0.00962968	0.1924
SWR	m1569*pop 9	-0.00201707	0.0090654	0.8239
SWR	m1569*pop 11	-0.0022117	0.0067437	0.743
SWR	m1569*pop 12	0.00945739	0.0088864	0.2873
SWR	m1569*pop 13	0.00890838	0.00639431	0.1637
SWR	m1569*pop 14	-0.000371481	0.00632628	0.9532
SWR	m1569*pop 15	-0.00247163	0.00665202	0.7103
SWR	m1569*pop 16	-0.0210231	0.00677203	0.0019
SWR	m1569*pop 18	-0.00630312	0.00966634	0.5144
SWR	m1569*pop 19	-0.0337102	0.0117005	0.004
SWR	m1569*pop 20	-0.0200045	0.00573367	0.0005
SWR	m1569*pop 21	0.00240051	0.0109108	0.8259
SWR	m1569*pop 22	-0.00419517	0.00753519	0.5778
SWR	m1569*pop 23	0.00218052	0.0103875	0.8337
SWR	m1569*pop 24	0.00243814	0.00887674	0.7836
SWR	m1569*pop 25	-0.0267826	0.0059178	<0.0001
SWR	m1569*pop 26	-0.0120449	0.00726728	0.0976
SWR	m2044*pop 1	0.00458774	0.00554038	0.4077
SWR	m2044*pop 2	-0.00218849	0.0093429	0.8148
SWR	m2044*pop 3	-0.00637216	0.00588349	0.2789
SWR	m2044*pop 4	-0.00836229	0.00573646	0.145
SWR	m2044*pop 5	-0.0127701	0.00577643	0.0271
SWR	m2044*pop 6	0.00190651	0.00631899	0.7629
SWR	m2044*pop 7	-0.0137277	0.00588876	0.0198
SWR	m2044*pop 8	-0.0306847	0.0101538	0.0025
SWR	m2044*pop 9	-0.00864391	0.00844807	0.3063
SWR	m2044*pop 11	-0.00858813	0.00650048	0.1866
SWR	m2044*pop 12	-0.0108126	0.00811665	0.1829
SWR	m2044*pop 13	-0.0157408	0.00676305	0.02
SWR	m2044*pop 14	0.0102254	0.00600312	0.0886
SWR	m2044*pop 15	0.00843833	0.00595806	0.1568
SWR	m2044*pop 16	0.00366998	0.00553223	0.5071
SWR	m2044*pop 18	-0.0180182	0.00859851	0.0362
SWR	m2044*pop 19	-0.00373663	0.0091041	0.6815
SWR	m2044*pop 20	-0.020238	0.00586726	0.0006
SWR	m2044*pop 21	0.000449794	0.00973988	0.9632
SWR	m2044*pop 22	-0.0239427	0.00908562	0.0085
SWR	m2044*pop 23	-0.022849	0.00892743	0.0105
SWR	m2044*pop 24	0.00313761	0.0090876	0.7299
SWR	m2044*pop 25	0.00229562	0.00551623	0.6773
SWR	m2044*pop 26	0.0136647	0.00581951	0.0189
SWR	m2188*pop 1	-0.0149444	0.0057912	0.0099
SWR	m2188*pop 2	-0.013847	0.009136	0.1297
SWR	m2188*pop 3	-0.0131605	0.00596739	0.0275
SWR	m2188*pop 4	-0.00622958	0.0057598	0.2795
SWR	m2188*pop 5	-0.023959	0.00599344	<0.0001
SWR	m2188*pop 6	-0.0132821	0.00608701	0.0292
SWR	m2188*pop 7	-0.00732971	0.00580113	0.2065
SWR	m2188*pop 8	0.0229602	0.0102885	0.0257
SWR	m2188*pop 9	-0.0278181	0.00848898	0.0011
SWR	m2188*pop 11	-0.00984998	0.00600096	0.1008
SWR	m2188*pop 12	-0.00842958	0.00835922	0.3134
SWR	m2188*pop 13	-0.00441182	0.0069778	0.5273
SWR	m2188*pop 14	-0.0108938	0.00610349	0.0744
SWR	m2188*pop 15	-0.0247287	0.0061355	<0.0001
SWR	m2188*pop 16	-0.0131669	0.0055629	0.018
SWR	m2188*pop 18	0.00465389	0.00906002	0.6075
SWR	m2188*pop 19	-0.00485251	0.00814787	0.5515
SWR	m2188*pop 20	-0.0128824	0.00593876	0.0302
SWR	m2188*pop 21	-0.00186011	0.00907826	0.8377
SWR	m2188*pop 22	0.000424304	0.00825936	0.959
SWR	m2188*pop 23	-0.0197134	0.00867465	0.0231
SWR	m2188*pop 24	-0.013236	0.00907615	0.1449
SWR	m2188*pop 25	-0.0190103	0.00570744	0.0009
SWR	m2188*pop 26	-0.0131489	0.00602041	0.029
SWR	m2541*pop 1	0.00777949	0.00528099	0.1408
SWR	m2541*pop 2	0.00747283	0.00794899	0.3473
SWR	m2541*pop 3	0.0059711	0.00541667	0.2704
SWR	m2541*pop 4	0.00391438	0.00532067	0.462
SWR	m2541*pop 5	0.00391934	0.00591439	0.5076
SWR	m2541*pop 6	-0.00807182	0.00576238	0.1614
SWR	m2541*pop 7	0.0049103	0.00553881	0.3754
SWR	m2541*pop 8	0.00767773	0.00831105	0.3557
SWR	m2541*pop 9	-0.00274904	0.00866864	0.7512
SWR	m2541*pop 11	0.00291884	0.00592095	0.6221
SWR	m2541*pop 12	-0.0105176	0.00739385	0.155
SWR	m2541*pop 13	0.0126119	0.00692755	0.0688
SWR	m2541*pop 14	0.014988	0.0050899	0.0033
SWR	m2541*pop 15	0.00287727	0.00611853	0.6382
SWR	m2541*pop 16	-0.00694328	0.00511977	0.1752
SWR	m2541*pop 18	-0.00595196	0.00850757	0.4842
SWR	m2541*pop 19	0.0111115	0.00880607	0.2071
SWR	m2541*pop 20	0.0034643	0.00554024	0.5318
SWR	m2541*pop 21	-0.0227159	0.00940516	0.0158
SWR	m2541*pop 22	-0.0105654	0.00810488	0.1925
SWR	m2541*pop 23	0.0196102	0.00858687	0.0225
SWR	m2541*pop 24	-0.0179586	0.0083876	0.0324
SWR	m2541*pop 25	-0.0166578	0.0052309	0.0015
SWR	m2541*pop 26	0.0217222	0.00583754	0.0002
SWR	m2968*pop 1	0.00106485	0.00558521	0.8488
SWR	m2968*pop 2	0.00236161	0.00869623	0.786
SWR	m2968*pop 3	-0.0101771	0.00553448	0.0661
SWR	m2968*pop 4	0.00683344	0.00586229	0.2439
SWR	m2968*pop 5	-0.0108908	0.00576424	0.059
SWR	m2968*pop 6	-0.00649416	0.00572113	0.2564
SWR	m2968*pop 7	0.0104195	0.0057401	0.0696
SWR	m2968*pop 8	-0.00495822	0.00893817	0.5791
SWR	m2968*pop 9	-0.00697287	0.00746821	0.3506
SWR	m2968*pop 11	-0.0194938	0.0074387	0.0088
SWR	m2968*pop 12	-0.0313853	0.00714704	<0.0001
SWR	m2968*pop 13	-0.00526031	0.00677824	0.4378
SWR	m2968*pop 14	-0.0112089	0.00549901	0.0416
SWR	m2968*pop 15	0.00109731	0.00607944	0.8568
SWR	m2968*pop 16	-0.0167	0.0053108	0.0017
SWR	m2968*pop 18	-0.00242782	0.00884148	0.7837
SWR	m2968*pop 19	-0.00630333	0.00797841	0.4296
SWR	m2968*pop 20	-0.010528	0.00532983	0.0483
SWR	m2968*pop 21	-0.0266767	0.0101888	0.0089
SWR	m2968*pop 22	0.00773303	0.00834929	0.3544
SWR	m2968*pop 23	-0.0248296	0.0106327	0.0196
SWR	m2968*pop 24	-0.0446246	0.0093212	<0.0001
SWR	m2968*pop 25	-0.0134817	0.0052516	0.0103
SWR	m2968*pop 26	-0.0113924	0.00579614	0.0495
SWR	m3204*pop 1	0.0126192	0.00558518	0.0239
SWR	m3204*pop 2	-0.0076675	0.00812951	0.3457
SWR	m3204*pop 3	-0.00603916	0.00542158	0.2654
SWR	m3204*pop 4	0.00612214	0.00567618	0.2809
SWR	m3204*pop 5	0.00784914	0.00582202	0.1777
SWR	m3204*pop 6	-0.00945171	0.00578171	0.1022
SWR	m3204*pop 7	-0.00489308	0.00573385	0.3935
SWR	m3204*pop 8	-0.00545316	0.0082428	0.5083
SWR	m3204*pop 9	0.0107837	0.00862628	0.2114
SWR	m3204*pop 11	0.0111797	0.00631379	0.0767
SWR	m3204*pop 12	-0.00852138	0.00792599	0.2824
SWR	m3204*pop 13	-0.000955815	0.00711532	0.8932
SWR	m3204*pop 14	0.00490658	0.00506105	0.3324
SWR	m3204*pop 15	0.0202616	0.00617593	0.001
SWR	m3204*pop 16	0.00209778	0.00523724	0.6888
SWR	m3204*pop 18	-0.000217957	0.00862728	0.9798
SWR	m3204*pop 19	-0.00143889	0.00832819	0.8628
SWR	m3204*pop 20	-0.0101497	0.00538506	0.0596
SWR	m3204*pop 21	-0.0118167	0.00933384	0.2056
SWR	m3204*pop 22	0.0192394	0.00874193	0.0278
SWR	m3204*pop 23	0.0236951	0.00975142	0.0152
SWR	m3204*pop 24	0.0183593	0.00830578	0.0272
SWR	m3204*pop 25	0.0192665	0.00518411	0.0002
SWR	m3204*pop 26	-0.0300263	0.00582978	<0.0001
SWR	m3513*pop 1	-0.0144361	0.00539125	0.0075
SWR	m3513*pop 2	-0.00652446	0.00804429	0.4174
SWR	m3513*pop 3	-0.0255384	0.00526717	<0.0001
SWR	m3513*pop 4	-0.0028763	0.0054615	0.5985
SWR	m3513*pop 5	-0.0184791	0.00568798	0.0012
SWR	m3513*pop 6	-0.0017514	0.00562855	0.7557
SWR	m3513*pop 7	-0.0208823	0.00587888	0.0004
SWR	m3513*pop 8	-0.0224884	0.00833351	0.007
SWR	m3513*pop 9	-0.0218617	0.00783751	0.0053
SWR	m3513*pop 11	-0.0119781	0.00611185	0.0501
SWR	m3513*pop 12	-0.0293976	0.00731062	<0.0001
SWR	m3513*pop 13	-0.0082787	0.00669551	0.2164
SWR	m3513*pop 14	-0.0213252	0.00526053	<0.0001
SWR	m3513*pop 15	-0.0196548	0.00569475	0.0006
SWR	m3513*pop 16	-0.0215738	0.00527453	<0.0001
SWR	m3513*pop 18	-0.0203949	0.00831291	0.0142
SWR	m3513*pop 19	-0.0163283	0.00787511	0.0382
SWR	m3513*pop 20	-0.0139109	0.00538244	0.0098
SWR	m3513*pop 21	-0.014728	0.00878895	0.0939
SWR	m3513*pop 22	-0.0139963	0.00792198	0.0774
SWR	m3513*pop 23	-0.0045607	0.00848036	0.5908
SWR	m3513*pop 24	0.00333878	0.00946868	0.7244
SWR	m3513*pop 25	-0.00190204	0.00542774	0.726
SWR	m3513*pop 26	-0.00758016	0.00582369	0.1932
SWR	m3748*pop 1	0.000800077	0.00615316	0.8966
SWR	m3748*pop 2	-0.000919621	0.00961169	0.9238
SWR	m3748*pop 3	0.00340272	0.00590347	0.5644
SWR	m3748*pop 4	-0.0171877	0.00635349	0.0069
SWR	m3748*pop 5	0.00232923	0.0063281	0.7128
SWR	m3748*pop 6	-0.0187019	0.00617757	0.0025
SWR	m3748*pop 7	-0.0115397	0.00615088	0.0608
SWR	m3748*pop 8	-0.000385157	0.00911499	0.9663
SWR	m3748*pop 9	-0.010566	0.00891582	0.2361
SWR	m3748*pop 11	0.00680903	0.00713829	0.3402
SWR	m3748*pop 12	-0.0230554	0.00848788	0.0066
SWR	m3748*pop 13	0.0051832	0.0073412	0.4802
SWR	m3748*pop 14	-0.00128056	0.00664912	0.8473
SWR	m3748*pop 15	-0.0296504	0.00619343	<0.0001
SWR	m3748*pop 16	-0.0147595	0.00626361	0.0185
SWR	m3748*pop 18	0.00196357	0.00963793	0.8386
SWR	m3748*pop 19	9.5838e-06	0.00861849	0.9991
SWR	m3748*pop 20	0.0118255	0.00616384	0.0552
SWR	m3748*pop 21	-0.00721406	0.0100149	0.4714
SWR	m3748*pop 22	-0.0260035	0.00981164	0.0081
SWR	m3748*pop 23	0.00848925	0.0101711	0.404
SWR	m3748*pop 24	0.0231181	0.010183	0.0233
SWR	m3748*pop 25	-0.00332651	0.00652399	0.6102
SWR	m3748*pop 26	-0.00170085	0.00717814	0.8127
SWR	m3850*pop 1	-0.00767739	0.00620426	0.216
SWR	m3850*pop 2	0.0119424	0.00990348	0.228
SWR	m3850*pop 3	-0.000727362	0.00582299	0.9006
SWR	m3850*pop 4	-0.00142733	0.00611219	0.8154
SWR	m3850*pop 5	-0.00203925	0.00636003	0.7485
SWR	m3850*pop 6	0.00176832	0.00617082	0.7745
SWR	m3850*pop 7	0.0175748	0.00652605	0.0071
SWR	m3850*pop 8	-0.0145172	0.00892936	0.1041
SWR	m3850*pop 9	-0.0138119	0.00873883	0.1141
SWR	m3850*pop 11	0.00748269	0.00700689	0.2857
SWR	m3850*pop 12	0.00336026	0.00872915	0.7003
SWR	m3850*pop 13	0.00426317	0.00793309	0.591
SWR	m3850*pop 14	-0.00777228	0.00708384	0.2727
SWR	m3850*pop 15	-0.0196987	0.00647736	0.0024
SWR	m3850*pop 16	-0.00311767	0.00630154	0.6208
SWR	m3850*pop 18	-0.0282733	0.0103869	0.0065
SWR	m3850*pop 19	-0.0130646	0.00954051	0.171
SWR	m3850*pop 20	-0.0195849	0.00627722	0.0018
SWR	m3850*pop 21	0.00598074	0.00974185	0.5393
SWR	m3850*pop 22	0.0148962	0.00945323	0.1152
SWR	m3850*pop 23	-0.0251124	0.0105349	0.0172
SWR	m3850*pop 24	0.00047935	0.0102979	0.9629
SWR	m3850*pop 25	-0.0188381	0.00634045	0.003
SWR	m3850*pop 26	-0.0174951	0.00725842	0.016
SWR	m4468*pop 1	-0.0081877	0.00529644	0.1223
SWR	m4468*pop 2	-0.00283238	0.00853355	0.74
SWR	m4468*pop 3	-0.00976346	0.00536784	0.069
SWR	m4468*pop 4	-0.00487153	0.00530471	0.3585
SWR	m4468*pop 5	-0.0162333	0.00558578	0.0037
SWR	m4468*pop 6	-0.00824461	0.00559501	0.1407
SWR	m4468*pop 7	-0.00151287	0.0057708	0.7932
SWR	m4468*pop 8	-0.00313142	0.0093609	0.738
SWR	m4468*pop 9	-0.0164629	0.00844414	0.0513
SWR	m4468*pop 11	-0.00368653	0.0060054	0.5394
SWR	m4468*pop 12	0.00999438	0.00771443	0.1952
SWR	m4468*pop 13	-0.00694295	0.0066013	0.293
SWR	m4468*pop 14	-0.0181404	0.00513575	0.0004
SWR	m4468*pop 15	-0.016833	0.0057707	0.0036
SWR	m4468*pop 16	-0.0213131	0.0052256	<0.0001
SWR	m4468*pop 18	-0.0442813	0.00840952	<0.0001
SWR	m4468*pop 19	0.00279431	0.00886561	0.7526
SWR	m4468*pop 20	-0.00671871	0.0056187	0.2319
SWR	m4468*pop 21	-0.00941321	0.00929446	0.3113
SWR	m4468*pop 22	-0.000220345	0.00795346	0.9779
SWR	m4468*pop 23	0.0168009	0.00897948	0.0615
SWR	m4468*pop 24	-0.0147082	0.008026	0.067
SWR	m4468*pop 25	-0.0135406	0.00547774	0.0135
SWR	m4468*pop 26	-0.0115171	0.00571539	0.044
SWR	m5161*pop 1	0.00524186	0.00515197	0.309
SWR	m5161*pop 2	0.0112158	0.00816032	0.1694
SWR	m5161*pop 3	0.00519318	0.00555643	0.3501
SWR	m5161*pop 4	-0.00714848	0.00563786	0.2049
SWR	m5161*pop 5	0.0115913	0.005411	0.0323
SWR	m5161*pop 6	-0.0010038	0.00574025	0.8612
SWR	m5161*pop 7	-0.00587006	0.00605879	0.3327
SWR	m5161*pop 8	0.00737607	0.00983053	0.4531
SWR	m5161*pop 9	-0.00570413	0.007625	0.4545
SWR	m5161*pop 11	0.0151023	0.00596035	0.0113
SWR	m5161*pop 12	0.0137877	0.00720144	0.0557
SWR	m5161*pop 13	0.00831182	0.00654269	0.2041
SWR	m5161*pop 14	0.004317	0.00537954	0.4223
SWR	m5161*pop 15	0.0204806	0.0055832	0.0002
SWR	m5161*pop 16	0.0108787	0.00505083	0.0313
SWR	m5161*pop 18	0.00186808	0.00810633	0.8178
SWR	m5161*pop 19	0.000935109	0.00807895	0.9079
SWR	m5161*pop 20	0.00961398	0.00545399	0.0781
SWR	m5161*pop 21	0.000241527	0.00899184	0.9786
SWR	m5161*pop 22	0.0126953	0.00777075	0.1024
SWR	m5161*pop 23	0.0276314	0.00903483	0.0022
SWR	m5161*pop 24	0.0206267	0.0092009	0.0251
SWR	m5161*pop 25	-0.0128947	0.00533709	0.0158
SWR	m5161*pop 26	0.0152024	0.00640281	0.0177
SWR	m5828*pop 1	0.0102023	0.00535058	0.0567
SWR	m5828*pop 2	-0.0109179	0.00874074	0.2118
SWR	m5828*pop 3	-0.0106548	0.00530598	0.0447
SWR	m5828*pop 4	-0.00164077	0.00575682	0.7757
SWR	m5828*pop 5	-0.0123609	0.00554987	0.026
SWR	m5828*pop 6	-0.0126439	0.0057624	0.0283
SWR	m5828*pop 7	-0.00348907	0.00561315	0.5343
SWR	m5828*pop 8	-0.0220744	0.00897376	0.014
SWR	m5828*pop 9	-0.0193019	0.00855704	0.0242
SWR	m5828*pop 11	-0.00594508	0.00620138	0.3378
SWR	m5828*pop 12	-0.00906702	0.00777829	0.2439
SWR	m5828*pop 13	-0.0103794	0.00671315	0.1222
SWR	m5828*pop 14	-0.00210962	0.00536573	0.6942
SWR	m5828*pop 15	-0.015841	0.00553313	0.0042
SWR	m5828*pop 16	-0.00671182	0.00503994	0.1831
SWR	m5828*pop 18	0.0141187	0.00800425	0.0779
SWR	m5828*pop 19	-0.0179704	0.00819464	0.0284
SWR	m5828*pop 20	-0.014412	0.00527381	0.0063
SWR	m5828*pop 21	0.013596	0.00872896	0.1195
SWR	m5828*pop 22	0.00886946	0.00823586	0.2816
SWR	m5828*pop 23	-0.00311829	0.00822158	0.7045
SWR	m5828*pop 24	-0.0242226	0.0089064	0.0066
SWR	m5828*pop 25	0.00259465	0.0052277	0.6197
SWR	m5828*pop 26	0.0059233	0.00580946	0.308
SWR	m6351*pop 1	0.0155166	0.00685217	0.0236
SWR	m6351*pop 2	0.00643608	0.00948017	0.4973
SWR	m6351*pop 3	0.0266963	0.00639573	<0.0001
SWR	m6351*pop 4	0.0183567	0.00655524	0.0051
SWR	m6351*pop 5	0.00404337	0.00674152	0.5487
SWR	m6351*pop 6	0.0133884	0.0074247	0.0715
SWR	m6351*pop 7	0.0419141	0.00708155	<0.0001
SWR	m6351*pop 8	0.0144775	0.0105532	0.1702
SWR	m6351*pop 9	0.0136871	0.0102369	0.1813
SWR	m6351*pop 11	0.00349863	0.0076297	0.6466
SWR	m6351*pop 12	0.0125735	0.0107256	0.2412
SWR	m6351*pop 13	0.0343477	0.0079946	<0.0001
SWR	m6351*pop 14	0.0106731	0.00592432	0.0717
SWR	m6351*pop 15	0.00666666	0.00724578	0.3576
SWR	m6351*pop 16	0.019684	0.00695523	0.0047
SWR	m6351*pop 18	0.0261549	0.00857965	0.0023
SWR	m6351*pop 19	0.0250728	0.0116749	0.0318
SWR	m6351*pop 20	0.0318431	0.00621832	<0.0001
SWR	m6351*pop 21	0.022219	0.00973689	0.0226
SWR	m6351*pop 22	0.00548731	0.0108089	0.6117
SWR	m6351*pop 23	0.00272653	0.00988873	0.7828
SWR	m6351*pop 24	0.0123396	0.0101702	0.2251
SWR	m6351*pop 25	0.00394146	0.00624585	0.5281
SWR	m6351*pop 26	0.00947481	0.00679112	0.1631
SWR	m6427*pop 1	0.0261109	0.00692277	0.0002
SWR	m6427*pop 2	-0.0240447	0.0102635	0.0192
SWR	m6427*pop 3	0.0148787	0.00694561	0.0323
SWR	m6427*pop 4	0.01067	0.0062119	0.086
SWR	m6427*pop 5	0.0131831	0.00665643	0.0478
SWR	m6427*pop 6	0.009604	0.00730076	0.1885
SWR	m6427*pop 7	0.0197032	0.00707406	0.0054
SWR	m6427*pop 8	0.0060859	0.0106417	0.5674
SWR	m6427*pop 9	0.0215449	0.0106147	0.0425
SWR	m6427*pop 11	-0.0163296	0.00769705	0.034
SWR	m6427*pop 12	0.0207091	0.0109099	0.0578
SWR	m6427*pop 13	-0.0323768	0.00805392	<0.0001
SWR	m6427*pop 14	0.000335545	0.00591859	0.9548
SWR	m6427*pop 15	0.00742717	0.00747633	0.3206
SWR	m6427*pop 16	0.00820735	0.00698867	0.2404
SWR	m6427*pop 18	0.0135117	0.00960678	0.1597
SWR	m6427*pop 19	0.00886889	0.0103839	0.3931
SWR	m6427*pop 20	-0.0397129	0.00632039	<0.0001
SWR	m6427*pop 21	0.00700175	0.00935632	0.4543
SWR	m6427*pop 22	0.0190095	0.0105921	0.0728
SWR	m6427*pop 23	0.00128559	0.00891137	0.8853
SWR	m6427*pop 24	-0.0255556	0.0105752	0.0157
SWR	m6427*pop 25	-0.0105321	0.00606533	0.0826
SWR	m6427*pop 26	0.0107521	0.0067344	0.1105
SWR	m6876*pop 1	0.00458054	0.00578379	0.4285
SWR	m6876*pop 2	0.023218	0.00901427	0.0101
SWR	m6876*pop 3	0.00465352	0.00560617	0.4066
SWR	m6876*pop 4	0.0132045	0.00588849	0.025
SWR	m6876*pop 5	0.0126574	0.0057278	0.0272
SWR	m6876*pop 6	0.00440838	0.00583968	0.4504
SWR	m6876*pop 7	-0.0319291	0.00592373	<0.0001
SWR	m6876*pop 8	0.0255691	0.00923403	0.0057
SWR	m6876*pop 9	0.0189531	0.00792196	0.0168
SWR	m6876*pop 11	0.0204738	0.00631317	0.0012
SWR	m6876*pop 12	0.00949627	0.00804295	0.2378
SWR	m6876*pop 13	0.017312	0.00681636	0.0112
SWR	m6876*pop 14	0.0166985	0.00541776	0.0021
SWR	m6876*pop 15	0.0177125	0.00568771	0.0019
SWR	m6876*pop 16	0.00475289	0.00537179	0.3764
SWR	m6876*pop 18	0.0261648	0.00821795	0.0015
SWR	m6876*pop 19	0.0176801	0.00857358	0.0393
SWR	m6876*pop 20	-0.00350028	0.0054782	0.5229
SWR	m6876*pop 21	-0.0054234	0.0101717	0.594
SWR	m6876*pop 22	0.00694939	0.00818476	0.3959
SWR	m6876*pop 23	0.00895774	0.00931115	0.3361
SWR	m6876*pop 24	0.0172851	0.00952798	0.0698
SWR	m6876*pop 25	0.0200635	0.00572834	0.0005
SWR	m6876*pop 26	-0.00105363	0.00623454	0.8658
SWR	m7023*pop 1	-0.0253261	0.00576977	<0.0001
SWR	m7023*pop 2	-0.020821	0.00834038	0.0126
SWR	m7023*pop 3	0.0144459	0.00619103	0.0197
SWR	m7023*pop 4	-0.0240959	0.00583816	<0.0001
SWR	m7023*pop 5	-0.0188951	0.00590174	0.0014
SWR	m7023*pop 6	-0.0503609	0.00611085	<0.0001
SWR	m7023*pop 7	-0.00129052	0.00590508	0.827
SWR	m7023*pop 8	-0.00467133	0.00971274	0.6306
SWR	m7023*pop 9	-0.0299123	0.00792759	0.0002
SWR	m7023*pop 11	-0.0276847	0.00620597	<0.0001
SWR	m7023*pop 12	-0.0303031	0.00822508	0.0002
SWR	m7023*pop 13	-0.0319174	0.00676066	<0.0001
SWR	m7023*pop 14	-0.0246207	0.00567679	<0.0001
SWR	m7023*pop 15	-0.0447806	0.00576391	<0.0001
SWR	m7023*pop 16	-0.0342392	0.00553531	<0.0001
SWR	m7023*pop 18	0.00227726	0.00879569	0.7957
SWR	m7023*pop 19	-0.0353693	0.00877141	<0.0001
SWR	m7023*pop 20	-0.0687203	0.00560075	<0.0001
SWR	m7023*pop 21	0.00528643	0.011159	0.6357
SWR	m7023*pop 22	-0.0213639	0.00800624	0.0077
SWR	m7023*pop 23	-0.0133669	0.0109395	0.2219
SWR	m7023*pop 24	-0.0251836	0.00878217	0.0042
SWR	m7023*pop 25	-0.0244903	0.00589311	<0.0001
SWR	m7023*pop 26	0.00145451	0.00619164	0.8143
SWR	m7233*pop 1	-0.0146763	0.00555257	0.0083
SWR	m7233*pop 2	0.00303148	0.00784646	0.6993
SWR	m7233*pop 3	-0.00336783	0.00557133	0.5456
SWR	m7233*pop 4	-0.0191422	0.00549985	0.0005
SWR	m7233*pop 5	0.00597964	0.00583666	0.3057
SWR	m7233*pop 6	-0.00877427	0.0058558	0.1342
SWR	m7233*pop 7	0.00835218	0.00555911	0.1331
SWR	m7233*pop 8	-0.0148937	0.0103033	0.1484
SWR	m7233*pop 9	-0.0120835	0.00802315	0.1322
SWR	m7233*pop 11	0.00870544	0.00596711	0.1447
SWR	m7233*pop 12	0.00460105	0.00836396	0.5823
SWR	m7233*pop 13	0.00404798	0.00669988	0.5458
SWR	m7233*pop 14	-0.00620162	0.00519675	0.2328
SWR	m7233*pop 15	-0.0132516	0.00573009	0.0208
SWR	m7233*pop 16	-0.0236062	0.00571067	<0.0001
SWR	m7233*pop 18	-0.0107461	0.00847195	0.2048
SWR	m7233*pop 19	0.00289592	0.00852926	0.7342
SWR	m7233*pop 20	-0.0110197	0.00519032	0.0338
SWR	m7233*pop 21	-0.0133584	0.00965305	0.1665
SWR	m7233*pop 22	0.00953102	0.00826558	0.249
SWR	m7233*pop 23	-0.0198699	0.00900229	0.0274
SWR	m7233*pop 24	0.00271736	0.00884325	0.7587
SWR	m7233*pop 25	-0.00581569	0.00599748	0.3323
SWR	m7233*pop 26	-0.0132629	0.00577457	0.0217
DTAR	m201*pop 1	-0.000666461	0.00185746	0.7198
DTAR	m201*pop 2	-0.00611793	0.00262104	0.0197
DTAR	m201*pop 3	0.000555086	0.00189651	0.7698
DTAR	m201*pop 4	-0.00621477	0.00193625	0.0013
DTAR	m201*pop 5	-0.00782609	0.00201348	0.0001
DTAR	m201*pop 6	-0.0112566	0.00198394	<0.0001
DTAR	m201*pop 7	-0.00349333	0.001938	0.0716
DTAR	m201*pop 8	-0.000480522	0.00284762	0.866
DTAR	m201*pop 9	-0.00551063	0.00259575	0.0338
DTAR	m201*pop 11	-0.0164008	0.00209326	<0.0001
DTAR	m201*pop 12	-0.00159037	0.00247266	0.5202
DTAR	m201*pop 13	-0.0135372	0.00229514	<0.0001
DTAR	m201*pop 14	-0.00590453	0.00183755	0.0013
DTAR	m201*pop 15	-0.013009	0.00196243	<0.0001
DTAR	m201*pop 16	-0.0153785	0.00175067	<0.0001
DTAR	m201*pop 18	-0.00532514	0.00264221	0.044
DTAR	m201*pop 19	-0.00389437	0.00261356	0.1363
DTAR	m201*pop 20	-0.010896	0.0018129	<0.0001
DTAR	m201*pop 21	-0.000637125	0.00284948	0.8231
DTAR	m201*pop 22	-0.00136367	0.00272704	0.6171
DTAR	m201*pop 23	-0.00231775	0.00269884	0.3905
DTAR	m201*pop 24	0.00416896	0.00258319	0.1067
DTAR	m201*pop 25	-0.00566143	0.00177788	0.0015
DTAR	m201*pop 26	-0.00465164	0.00214496	0.0302
DTAR	m2980*pop 1	-0.000444102	0.00185074	0.8104
DTAR	m2980*pop 2	0.000783063	0.00271395	0.773
DTAR	m2980*pop 3	-0.00183529	0.00187835	0.3286
DTAR	m2980*pop 4	-0.00317158	0.00192642	0.0998
DTAR	m2980*pop 5	-0.00453892	0.00194199	0.0195
DTAR	m2980*pop 6	-0.00500734	0.00200038	0.0124
DTAR	m2980*pop 7	0.000302726	0.00191819	0.8746
DTAR	m2980*pop 8	-0.000307724	0.00288411	0.915
DTAR	m2980*pop 9	-0.00274581	0.00259352	0.2898
DTAR	m2980*pop 11	-0.00760203	0.00292747	0.0095
DTAR	m2980*pop 12	-0.00550531	0.00250915	0.0283
DTAR	m2980*pop 13	-0.000110087	0.00224503	0.9609
DTAR	m2980*pop 14	-0.00581009	0.00185571	0.0018
DTAR	m2980*pop 15	0.004472	0.00200951	0.0261
DTAR	m2980*pop 16	-0.00871277	0.00180493	<0.0001
DTAR	m2980*pop 18	0.000567848	0.00272618	0.835
DTAR	m2980*pop 19	-0.000863409	0.00262096	0.7419
DTAR	m2980*pop 20	-0.00720664	0.00184399	<0.0001
DTAR	m2980*pop 21	-0.00500662	0.00312842	0.1096
DTAR	m2980*pop 22	0.00265819	0.00261737	0.3099
DTAR	m2980*pop 23	-0.00227733	0.00270596	0.4001
DTAR	m2980*pop 24	-0.00913704	0.00284076	0.0013
DTAR	m2980*pop 25	-0.00539705	0.00185887	0.0037
DTAR	m2980*pop 26	-0.0039392	0.00197196	0.0459
DTAR	m3495*pop 1	-0.00148146	0.00186692	0.4275
DTAR	m3495*pop 2	-0.000458531	0.00256678	0.8582
DTAR	m3495*pop 3	-0.00187537	0.00181887	0.3026
DTAR	m3495*pop 4	-0.000469661	0.0018863	0.8034
DTAR	m3495*pop 5	-0.0029511	0.00197653	0.1355
DTAR	m3495*pop 6	-0.00172956	0.00202687	0.3936
DTAR	m3495*pop 7	-0.00161509	0.00192869	0.4024
DTAR	m3495*pop 8	-0.000484819	0.00274419	0.8598
DTAR	m3495*pop 9	-0.00211205	0.00260561	0.4177
DTAR	m3495*pop 11	-0.00529861	0.0020377	0.0094
DTAR	m3495*pop 12	-0.00547579	0.00247245	0.0269
DTAR	m3495*pop 13	-0.00126748	0.00232522	0.5857
DTAR	m3495*pop 14	-0.00331986	0.00179888	0.0651
DTAR	m3495*pop 15	0.00193463	0.00198691	0.3303
DTAR	m3495*pop 16	-0.010642	0.00180818	<0.0001
DTAR	m3495*pop 18	-0.00143066	0.00266836	0.5919
DTAR	m3495*pop 19	-0.000239009	0.00259572	0.9266
DTAR	m3495*pop 20	-0.0141925	0.00180815	<0.0001
DTAR	m3495*pop 21	-0.00205737	0.00289686	0.4776
DTAR	m3495*pop 22	-0.00241103	0.0026287	0.3591
DTAR	m3495*pop 23	-0.0020224	0.002858	0.4792
DTAR	m3495*pop 24	0.000660816	0.00275495	0.8105
DTAR	m3495*pop 25	-0.0002983	0.00183873	0.8711
DTAR	m3495*pop 26	-0.00186573	0.0020184	0.3554
DTAR	m3854*pop 1	-0.00081204	0.00182673	0.6567
DTAR	m3854*pop 2	-0.00175215	0.00265172	0.5088
DTAR	m3854*pop 3	-0.00214943	0.00183307	0.2411
DTAR	m3854*pop 4	-0.000623404	0.00187225	0.7392
DTAR	m3854*pop 5	-0.00279836	0.00198326	0.1584
DTAR	m3854*pop 6	-1.99165e-05	0.00196526	0.9919
DTAR	m3854*pop 7	0.00172234	0.00200745	0.391
DTAR	m3854*pop 8	0.00485612	0.00282135	0.0853
DTAR	m3854*pop 9	-0.00250431	0.00266955	0.3483
DTAR	m3854*pop 11	0.00453934	0.00210454	0.0311
DTAR	m3854*pop 12	0.00120375	0.00265563	0.6504
DTAR	m3854*pop 13	0.00340907	0.0023226	0.1423
DTAR	m3854*pop 14	-0.000766041	0.00182503	0.6747
DTAR	m3854*pop 15	-0.00958931	0.00202088	<0.0001
DTAR	m3854*pop 16	-0.010047	0.00179343	<0.0001
DTAR	m3854*pop 18	-0.00565134	0.00269672	0.0362
DTAR	m3854*pop 19	-0.000437028	0.00276821	0.8746
DTAR	m3854*pop 20	-0.00595772	0.00184934	0.0013
DTAR	m3854*pop 21	0.000645999	0.0029107	0.8244
DTAR	m3854*pop 22	-0.00166353	0.00274499	0.5445
DTAR	m3854*pop 23	0.00025997	0.00284505	0.9272
DTAR	m3854*pop 24	8.8533e-06	0.00276882	0.9974
DTAR	m3854*pop 25	-0.00839975	0.00184511	<0.0001
DTAR	m3854*pop 26	-0.0015408	0.00218534	0.4808
DTAR	m6356*pop 1	0.00172921	0.00221111	0.4342
DTAR	m6356*pop 2	0.00337908	0.00329386	0.305
DTAR	m6356*pop 3	0.00472567	0.00216784	0.0293
DTAR	m6356*pop 4	0.00484506	0.00197773	0.0144
DTAR	m6356*pop 5	0.00156787	0.00220515	0.4771
DTAR	m6356*pop 6	0.00450391	0.00242679	0.0636
DTAR	m6356*pop 7	0.00507737	0.00222925	0.0228
DTAR	m6356*pop 8	0.000240115	0.00310156	0.9383
DTAR	m6356*pop 9	0.00544932	0.00343356	0.1126
DTAR	m6356*pop 11	0.00379093	0.00243532	0.1197
DTAR	m6356*pop 12	0.00852308	0.00360977	0.0183
DTAR	m6356*pop 13	0.0122944	0.0027128	<0.0001
DTAR	m6356*pop 14	0.00619997	0.00210166	0.0032
DTAR	m6356*pop 15	0.00632246	0.00221612	0.0044
DTAR	m6356*pop 16	0.00780184	0.00218255	0.0004
DTAR	m6356*pop 18	0.00357028	0.00279189	0.2011
DTAR	m6356*pop 19	0.00101822	0.00313887	0.7457
DTAR	m6356*pop 20	0.00975088	0.00207927	<0.0001
DTAR	m6356*pop 21	0.00156539	0.00312997	0.617
DTAR	m6356*pop 22	0.000291268	0.00330671	0.9298
DTAR	m6356*pop 23	0.00271989	0.00311444	0.3826
DTAR	m6356*pop 24	0.00179112	0.00318936	0.5744
DTAR	m6356*pop 25	0.00341786	0.00221093	0.1222
DTAR	m6356*pop 26	0.00304269	0.0022833	0.1828
DTAR	m6444*pop 1	0.00156889	0.00226468	0.4885
DTAR	m6444*pop 2	-0.00353042	0.00349303	0.3122
DTAR	m6444*pop 3	0.00178864	0.00220355	0.417
DTAR	m6444*pop 4	0.000558053	0.00197322	0.7773
DTAR	m6444*pop 5	0.00287934	0.00222844	0.1964
DTAR	m6444*pop 6	0.00462279	0.00241716	0.0559
DTAR	m6444*pop 7	0.00345606	0.00222725	0.1208
DTAR	m6444*pop 8	-0.000791596	0.00300426	0.7922
DTAR	m6444*pop 9	0.0109184	0.00351689	0.0019
DTAR	m6444*pop 11	-0.00308144	0.00243944	0.2066
DTAR	m6444*pop 12	-0.00028524	0.00370709	0.9387
DTAR	m6444*pop 13	-0.0122013	0.00266563	<0.0001
DTAR	m6444*pop 14	-0.00380786	0.00206982	0.0659
DTAR	m6444*pop 15	-0.00466292	0.00237999	0.0502
DTAR	m6444*pop 16	0.00298124	0.0021988	0.1753
DTAR	m6444*pop 18	0.00241642	0.00289736	0.4043
DTAR	m6444*pop 19	0.00459617	0.00321919	0.1535
DTAR	m6444*pop 20	-0.019257	0.00213768	<0.0001
DTAR	m6444*pop 21	0.00678903	0.00305244	0.0262
DTAR	m6444*pop 22	0.00145658	0.00343403	0.6715
DTAR	m6444*pop 23	0.00203183	0.00296165	0.4927
DTAR	m6444*pop 24	-0.0030176	0.00345191	0.3821
DTAR	m6444*pop 25	-0.00473753	0.00223494	0.0341
DTAR	m6444*pop 26	0.00376312	0.00222885	0.0914
DTAR	m7027*pop 1	-0.00167001	0.00184194	0.3647
DTAR	m7027*pop 2	-0.00072113	0.00255096	0.7774
DTAR	m7027*pop 3	0.0032166	0.00189901	0.0904
DTAR	m7027*pop 4	-0.00459942	0.00192543	0.017
DTAR	m7027*pop 5	0.000571655	0.00196303	0.7709
DTAR	m7027*pop 6	-0.0105193	0.00195754	<0.0001
DTAR	m7027*pop 7	-0.00461529	0.00187759	0.014
DTAR	m7027*pop 8	-0.00126449	0.00272282	0.6424
DTAR	m7027*pop 9	-0.0143259	0.00259375	<0.0001
DTAR	m7027*pop 11	-0.00415035	0.00205102	0.0431
DTAR	m7027*pop 12	-0.00283574	0.00261392	0.2781
DTAR	m7027*pop 13	-0.00236687	0.00233117	0.31
DTAR	m7027*pop 14	-0.00156044	0.00184957	0.3989
DTAR	m7027*pop 15	-0.00461528	0.00200303	0.0213
DTAR	m7027*pop 16	-0.0168452	0.0017622	<0.0001
DTAR	m7027*pop 18	0.000996844	0.00269082	0.7111
DTAR	m7027*pop 19	-0.00660771	0.00273493	0.0158
DTAR	m7027*pop 20	-0.0328705	0.00186678	<0.0001
DTAR	m7027*pop 21	-0.00134692	0.0028479	0.6363
DTAR	m7027*pop 22	-0.00416806	0.00275874	0.1309
DTAR	m7027*pop 23	-0.00431601	0.00265495	0.1041
DTAR	m7027*pop 24	5.25763e-05	0.00269425	0.9844
DTAR	m7027*pop 25	-0.00633292	0.00179508	0.0004
DTAR	m7027*pop 26	0.000507401	0.00199004	0.7988

## Sheet: QTL p values_full model
Trait	parameter	Type III error	DF	SS	F	PROB
LES	m201*pop	SS3	24	385.129	32.4463	8.69814e-129
LES	m317*pop	SS3	24	75.9838	6.40148	3.52046e-20
LES	m793*pop	SS3	24	83.7669	7.0572	5.79469e-23
LES	m1287*pop	SS3	24	42.7476	3.6014	8.28182e-09
LES	m1489*pop	SS3	24	59.6303	5.02374	1.92151e-14
LES	m1576*pop	SS3	24	69.8032	5.88078	5.44654e-18
LES	m2188*pop	SS3	24	125.087	10.5383	5.58974e-38
LES	m2368*pop	SS3	24	35.1429	2.96072	1.90653e-06
LES	m2978*pop	SS3	24	102.642	8.64738	8.60017e-30
LES	m3202*pop	SS3	24	74.9191	6.31178	8.41878e-20
LES	m3503*pop	SS3	24	110.29	9.29172	1.40957e-32
LES	m3815*pop	SS3	24	107.948	9.0944	1.00645e-31
LES	m4457*pop	SS3	24	90.4958	7.62409	2.18162e-25
LES	m5067*pop	SS3	24	49.3536	4.15794	5.79985e-11
LES	m5831*pop	SS3	24	63.1497	5.32023	1.16352e-15
LES	m6353*pop	SS3	24	202.502	17.0604	4.51612e-66
LES	m6447*pop	SS3	24	132.785	11.1868	8.61511e-41
LES	m6536*pop	SS3	24	40.1906	3.38598	5.35547e-08
LES	m6874*pop	SS3	24	108.364	9.12946	7.09805e-32
LES	m7027*pop	SS3	24	521.206	43.9106	8.41208e-172
LES	m7229*pop	SS3	24	41.869	3.52738	1.57881e-08
HTR	m197*pop	SS3	24	4.39553	30.0372	1.28046e-119
HTR	m416*pop	SS3	24	0.967635	6.61241	4.37227e-21
HTR	m1287*pop	SS3	24	0.481217	3.28843	1.22568e-07
HTR	m1495*pop	SS3	24	0.466503	3.18788	2.87127e-07
HTR	m1582*pop	SS3	24	0.565952	3.86748	7.83652e-10
HTR	m2187*pop	SS3	24	1.13802	7.77677	4.61989e-26
HTR	m2978*pop	SS3	24	0.745608	5.09517	9.63716e-15
HTR	m3207*pop	SS3	24	0.655383	4.47862	3.05183e-12
HTR	m3509*pop	SS3	24	1.21068	8.27329	3.35909e-28
HTR	m3797*pop	SS3	24	1.07875	7.37174	2.52762e-24
HTR	m4216*pop	SS3	24	0.428019	2.9249	2.54519e-06
HTR	m4468*pop	SS3	24	0.88403	6.04109	1.13105e-18
HTR	m4994*pop	SS3	24	0.406815	2.78	8.21172e-06
HTR	m5872*pop	SS3	24	0.566265	3.86962	7.68801e-10
HTR	m6354*pop	SS3	24	1.45726	9.95828	1.69785e-35
HTR	m6444*pop	SS3	24	1.23248	8.42227	7.64157e-29
HTR	m6875*pop	SS3	24	1.19346	8.1556	1.08083e-27
HTR	m7025*pop	SS3	24	4.49567	30.7215	2.51852e-122
HTR	m7229*pop	SS3	24	0.648331	4.43042	4.75729e-12
SWR	m198*pop	SS3	24	2.07997	21.6579	2.48232e-85
SWR	m413*pop	SS3	24	0.335691	3.49541	2.09068e-08
SWR	m716*pop	SS3	24	0.215534	2.24427	0.000492125
SWR	m1287*pop	SS3	24	0.254718	2.65228	2.26935e-05
SWR	m1465*pop	SS3	24	0.421107	4.38482	7.36358e-12
SWR	m1569*pop	SS3	24	0.2846	2.96343	1.86863e-06
SWR	m2044*pop	SS3	24	0.298593	3.10913	5.59814e-07
SWR	m2188*pop	SS3	24	0.442374	4.60626	9.56176e-13
SWR	m2541*pop	SS3	24	0.276974	2.88402	3.57131e-06
SWR	m2968*pop	SS3	24	0.424995	4.4253	5.07812e-12
SWR	m3204*pop	SS3	24	0.371182	3.86497	8.11758e-10
SWR	m3513*pop	SS3	24	0.647922	6.74655	1.23606e-21
SWR	m3748*pop	SS3	24	0.306667	3.1932	2.76703e-07
SWR	m3850*pop	SS3	24	0.27986	2.91408	2.79703e-06
SWR	m4468*pop	SS3	24	0.438697	4.56797	1.36286e-12
SWR	m5161*pop	SS3	24	0.297045	3.09302	6.4031e-07
SWR	m5828*pop	SS3	24	0.292254	3.04313	9.68966e-07
SWR	m6351*pop	SS3	24	0.619536	6.45098	2.20724e-20
SWR	m6427*pop	SS3	24	0.5179	5.39269	5.89942e-16
SWR	m6876*pop	SS3	24	0.52602	5.47724	2.63633e-16
SWR	m7023*pop	SS3	24	2.06082	21.4585	1.66833e-84
SWR	m7233*pop	SS3	24	0.307105	3.19776	2.66275e-07
DTAR	m201*pop	SS3	24	0.18992	15.0035	9.35647e-58
DTAR	m2980*pop	SS3	24	0.0574135	4.5356	1.68259e-12
DTAR	m3495*pop	SS3	24	0.0642304	5.07413	1.07365e-14
DTAR	m3854*pop	SS3	24	0.0560643	4.42902	4.51467e-12
DTAR	m6356*pop	SS3	24	0.0587978	4.64497	6.0816e-13
DTAR	m6444*pop	SS3	24	0.078524	6.20332	2.03283e-19
DTAR	m7027*pop	SS3	24	0.270478	21.3675	3.80991e-85
