# Supplementary material for: A Genome-Wide Association Study of the Maize Hypersensitive Defense Response Identifies Genes That Cluster in Related Pathways
Source: PLoS Genet. 2014 Aug 28;10(8):e1004562. doi: 10.1371/journal.pgen.1004562 (PMC4148229; doi:10.1371/journal.pgen.1004562)
Supplement: File S3 — QTL peak, LOD scores, proportion of contribution to phenotypic variance (R2) and allelic effects of QTL computed from the single family QTL analysis on LES, HTR, SWR and DTAR. (XLSX) [file pgen.1004562.s012.xlsx]

## Sheet: Sheet1
Pop-Id	Population	Trait	Chr	peak (cM)	LOD	left (cM)	right (cM)	R^2 (%)	Additive effect
1	B73 x B97	LES	1	57.2	3.53058	46	60.8	4.5292	-0.18004
1	B73 x B97	LES	1	174.4	4.13609	153.2	181.6	5.1094	-0.189007
1	B73 x B97	LES	2	97.6	3.73524	95.2	110.8	4.6194	0.179884
1	B73 x B97	LES	3	78.8	6.90819	67.2	89.6	8.1998	-0.240437
1	B73 x B97	LES	4	111	4.2547	107.6	114.8	5.7935	0.203774
1	B73 x B97	LES	7	10.4	3.04331	9.2	10.8	4.0167	0.169978
1	B73 x B97	LES	9	29.4	3.80876	28.2	30.2	5.3769	0.232102
1	B73 x B97	LES	9	39	8.50952	39	39	15.0075	0.324017
1	B73 x B97	LES	9	58.8	5.75452	45.4	58.8	8.044	0.265648
1	B73 x B97	LES	10	32.4	8.25306	28.6	44	12.4011	-0.300736
2	B73 x CML103	LES	1	35.2	6.13735	27.6	44	16.8171	-0.364562
2	B73 x CML103	LES	5	107	6.36384	105	117	17.8121	0.342117
3	B73 x CML228	LES	2	78.8	6.26722	70.8	87.6	11.4403	0.253453
3	B73 x CML228	LES	5	6.2	3.57359	5	7	6.8948	-0.196654
3	B73 x CML228	LES	9	28.6	11.3862	18.6	38.2	21.6309	0.347915
4	B73 x CML247	LES	1	35.2	16.1074	25.2	44.8	23.275	-0.488787
4	B73 x CML247	LES	2	50	4.74173	42	59.6	5.8458	0.24606
4	B73 x CML247	LES	5	58.6	3.56874	55.8	62.2	4.3875	-0.213524
4	B73 x CML247	LES	9	31	6.2866	25.4	38.2	7.9532	0.283468
4	B73 x CML247	LES	10	45.4	7.47363	36.6	56.4	9.3626	-0.313151
5	B73 x CML277	LES	1	35.6	16.2597	25.6	45.2	32.8281	-0.551652
5	B73 x CML277	LES	3	59.2	7.85157	50.4	70	14.4192	-0.363397
5	B73 x CML277	LES	5	3.8	4.64851	0.2	13.4	8.4978	-0.280942
5	B73 x CML277	LES	6	46.2	5.34439	36.2	53.8	9.5822	-0.295605
6	B73 x CML322	LES	1	34	5.55719	28	35.2	9.6131	-0.491509
6	B73 x CML322	LES	1	59.6	5.51325	49.6	68.4	9.3813	-0.50766
6	B73 x CML322	LES	9	35	3.51908	29	36.6	5.6176	0.346785
6	B73 x CML322	LES	10	34.4	14.9697	24.8	44.6	24.8383	-0.731451
7	B73 x CML333	LES	1	34.8	8.13036	26.8	44.4	9.214	-0.548148
7	B73 x CML333	LES	1	58.8	8.70411	53.2	68.4	10.2618	-0.607009
7	B73 x CML333	LES	2	84.8	4.17113	82.4	92	4.7685	0.34271
7	B73 x CML333	LES	5	2.6	3.53383	0.6	9.4	3.7145	-0.308292
7	B73 x CML333	LES	9	27	18.6434	17	36.6	22.5792	0.7505
7	B73 x CML333	LES	10	2.4	10.7292	-6.4	12.4	12.3721	-0.571237
8	B73 x CML52	LES	1	158.8	4.50763	147.2	159.2	15.6882	0.353364
8	B73 x CML52	LES	3	30.8	4.5646	21.6	33.6	15.867	-0.350038
8	B73 x CML52	LES	8	56	5.09463	51.6	57.6	17.8954	-0.372611
9	B73 x CML69	LES	1	42.4	4.71008	30	48.8	13.6401	-0.387622
9	B73 x CML69	LES	2	149.6	3.75036	146.2	152.6	11.0761	0.350709
9	B73 x CML69	LES	3	48	3.8223	46	50	10.9019	-0.343503
9	B73 x CML69	LES	9	28.2	3.27343	28.2	28.6	9.1056	0.313032
11	B73 x IL14H	LES	1	43.6	6.61741	32	51.6	12.6439	-0.454354
11	B73 x IL14H	LES	2	67.2	4.01209	65.6	68.8	7.5916	-0.341682
11	B73 x IL14H	LES	8	67.2	3.76546	67.2	68	6.9854	-0.331037
11	B73 x IL14H	LES	10	33.4	5.61159	28.6	38.2	10.569	-0.406225
12	B73 x KI11	LES	2	85.6	3.84409	84.4	85.6	8.5076	0.325876
12	B73 x KI11	LES	4	50.4	8.13657	40.8	60	19.2472	-0.489593
12	B73 x KI11	LES	6	102.6	4.44324	94	107	10.0382	0.355509
12	B73 x KI11	LES	9	28.6	8.83541	20.2	38.2	22.7925	0.543437
12	B73 x KI11	LES	10	34	5.66225	29	38.4	13.035	-0.406504
13	B73 x KI3	LES	1	35.2	7.5021	28.8	44.8	19.9145	-0.50804
13	B73 x KI3	LES	10	34.6	3.44448	33.4	36.2	8.6204	-0.345531
14	B73 x KY21	LES	1	36.4	13.143	26.4	46	16.8139	-0.472101
14	B73 x KY21	LES	1	77.6	4.82525	70.8	89.6	5.6556	-0.277153
14	B73 x KY21	LES	5	11.8	8.78967	0.6	21	10.5955	-0.36696
14	B73 x KY21	LES	6	46.2	3.96713	39.2	50.2	4.7186	-0.248339
14	B73 x KY21	LES	10	32.6	7.24941	22.4	42.2	8.957	-0.341311
15	B73 x M162W	LES	1	34.8	19.1379	25.6	45.2	26.9932	-0.822828
15	B73 x M162W	LES	3	60.4	3.34291	60	60.4	4.1652	-0.341665
15	B73 x M162W	LES	5	65.8	7.78879	57	76.6	10.0141	-0.504741
15	B73 x M162W	LES	10	34.6	12.1424	24.6	44.4	16.0902	-0.645875
16	B73 x M37W	LES	1	37.2	16.1968	27.2	46.8	25.0138	-0.730363
16	B73 x M37W	LES	6	58.6	4.17394	46.6	59.6	5.6601	-0.348292
16	B73 x M37W	LES	9	40.6	4.39162	30.6	44.2	6.0025	0.357836
16	B73 x M37W	LES	10	32.4	12.039	22.4	42.2	17.8417	-0.623434
18	B73 x MO18W	LES	1	7.6	3.80341	4	13.6	9.2439	-0.31721
18	B73 x MO18W	LES	1	54	3.74852	54	55.2	9.1098	-0.321903
18	B73 x MO18W	LES	6	28.8	4.76176	23	38.6	11.5932	-0.359761
18	B73 x MO18W	LES	9	28.6	8.4807	21.8	38.2	22.2487	0.497599
18	B73 x MO18W	LES	10	9.2	6.05741	-1.2	16.4	15.6864	0.415915
19	B73 x MS71	LES	1	33.2	6.33097	23.2	42.8	17.1323	-0.42792
19	B73 x MS71	LES	5	57.4	3.71279	56.6	57.8	9.863	-0.297434
19	B73 x MS71	LES	10	32	5.87338	24.2	38.6	15.9633	-0.398091
20	B73 x NC350	LES	1	34.8	6.45776	25.2	44.8	6.9673	-0.562993
20	B73 x NC350	LES	3	45.2	8.2194	35.2	54.8	9.065	-0.631458
20	B73 x NC350	LES	5	72.2	5.53489	64.6	81.8	6.1373	-0.523246
20	B73 x NC350	LES	9	46.6	3.62531	44.8	50.6	3.58	-0.395206
20	B73 x NC350	LES	10	35.6	28.1918	25.4	45.2	37.5002	-1.29441
21	B73 x NC358	LES	1	79.2	3.74798	77.6	80	13.8535	-0.312393
21	B73 x NC358	LES	1	121.6	3.54955	120.4	122	13.1152	0.304847
21	B73 x NC358	LES	9	79	4.4164	69	82.8	17.3837	0.354462
22	B73 x OH43	LES	5	29	6.62058	19.4	39	20.3661	-0.365165
22	B73 x OH43	LES	8	101.6	3.78772	95.4	102.4	10.3214	0.251292
22	B73 x OH43	LES	10	28.8	4.99338	22.6	35.4	14.1911	-0.314057
23	B73 x OH7B	LES	3	61.2	3.31875	59.2	61.2	10.8097	-0.270682
23	B73 x OH7B	LES	10	71.8	5.78662	55.2	75	18.8104	-0.33861
24	B73 x P39	LES	1	42.4	5.02152	32.4	47.6	16.8816	0.447918
24	B73 x P39	LES	6	72.6	4.07395	65.8	73.2	13.8416	-0.409628
24	B73 x P39	LES	10	67.2	4.88155	62.8	76	16.5721	-0.46473
25	B73 x Tx303	LES	1	32.4	11.825	20.4	40	15.6437	-0.662848
25	B73 x Tx303	LES	1	148.4	4.91098	144.4	157.2	6.1103	-0.420269
25	B73 x Tx303	LES	5	71	8.22764	60.6	80.2	10.5781	-0.547956
25	B73 x Tx303	LES	9	49	3.52942	49	54.6	3.8902	-0.335084
25	B73 x Tx303	LES	10	5.6	7.41727	-1.2	8.4	9.3697	0.544288
25	B73 x Tx303	LES	10	28.2	11.3864	18.4	38.2	14.808	-0.684657
26	B73 x TZI8	LES	1	35.2	8.20601	28	47.6	13.9574	-0.367615
26	B73 x TZI8	LES	3	9.2	3.06848	9.2	9.6	4.6232	0.211346
26	B73 x TZI8	LES	4	105.4	3.63874	101.2	109.6	5.5759	-0.238342
26	B73 x TZI8	LES	6	21	5.53069	13	27.2	8.8983	-0.295761
26	B73 x TZI8	LES	9	31.8	11.2046	26.2	42.2	20.1924	0.44191
1	B73 x B97	HTR	3	75.6	3.8458	70.8	79.2	5.3715	0.01361
1	B73 x B97	HTR	5	9	3.71563	7.4	17.8	5.243	0.013738
1	B73 x B97	HTR	7	56.4	3.15469	56	56.4	4.3224	-0.012273
1	B73 x B97	HTR	9	29.4	10.0663	19.4	39	15.4717	-0.023161
1	B73 x B97	HTR	10	33.8	9.44269	28.6	42.4	14.1289	0.021818
2	B73 x CML103	HTR	1	32.4	5.30284	27.6	38	15.721	0.037731
2	B73 x CML103	HTR	1	77.2	5.07938	72.8	84.4	15.3971	0.036867
2	B73 x CML103	HTR	5	107	3.73911	106.2	107.4	11.3387	-0.031111
2	B73 x CML103	HTR	5	113.2	3.15349	113.2	114.2	9.5695	-0.029765
3	B73 x CML228	HTR	2	84.8	6.81141	73.6	92.4	11.7276	-0.026862
3	B73 x CML228	HTR	3	25.2	3.78374	24.8	27.6	6.5766	0.019873
3	B73 x CML228	HTR	5	5	5.88106	0.2	15	10.2208	0.02486
3	B73 x CML228	HTR	6	29.4	3.50605	29.2	30.4	6.0347	0.019129
3	B73 x CML228	HTR	9	28.6	10.5559	18.6	38.2	19.1771	-0.034165
4	B73 x CML247	HTR	1	35.2	9.62914	25.2	44.8	15.9209	0.041372
4	B73 x CML247	HTR	9	33.2	5.86782	24.8	43.2	9.0603	-0.030672
4	B73 x CML247	HTR	10	45.4	5.98877	36.6	53.4	9.2482	0.033306
5	B73 x CML277	HTR	1	35.6	12.8277	25.6	45.2	24.9	0.049607
5	B73 x CML277	HTR	3	52.4	11.3136	41.2	60.8	20.4405	0.044742
5	B73 x CML277	HTR	5	1.8	3.07216	0.2	4.2	5.3768	0.022776
5	B73 x CML277	HTR	6	48.2	3.28413	48.2	49.2	5.6549	0.023501
5	B73 x CML277	HTR	9	84.2	3.78647	76.8	86.8	6.4636	-0.024772
6	B73 x CML322	HTR	1	34	7.99517	28.4	43.6	12.1316	0.050206
6	B73 x CML322	HTR	3	56.4	4.11918	52.8	61.2	6.0083	0.035403
6	B73 x CML322	HTR	5	61	3.16119	60.6	61.4	4.5941	0.031248
6	B73 x CML322	HTR	9	39.4	5.92029	30.6	45.4	8.5805	-0.042077
6	B73 x CML322	HTR	10	33.6	17.2996	25	44.8	28.1812	0.075557
7	B73 x CML333	HTR	1	35.2	7.1183	26.4	46	9.9808	0.041024
7	B73 x CML333	HTR	1	68.8	4.00518	58.8	72	5.7143	0.03171
7	B73 x CML333	HTR	9	27	11.9464	17.4	37	17.015	-0.049464
7	B73 x CML333	HTR	10	2.4	9.40197	-6.4	9.2	13.3981	0.045504
7	B73 x CML333	HTR	10	55.2	4.28196	49	57	6.0952	0.029816
8	B73 x CML52	HTR	1	72.8	6.69016	65.6	79.2	24.4867	0.044977
8	B73 x CML52	HTR	8	56	5.45674	52.8	57.2	19.8404	0.039237
9	B73 x CML69	HTR	1	37.6	5.71652	27.6	44.4	18.9733	0.05853
9	B73 x CML69	HTR	3	48	5.56062	40	52	17.9962	0.056097
9	B73 x CML69	HTR	5	153.6	4.57998	138.2	153.6	15.6759	0.053796
11	B73 x IL14H	HTR	1	35.2	10.8131	29.6	49.2	23.0078	0.060072
11	B73 x IL14H	HTR	5	112.6	3.339	111.8	113	7.0565	-0.032906
11	B73 x IL14H	HTR	10	34	4.36867	31.4	36.2	8.6936	0.036941
12	B73 x KI11	HTR	4	74.4	3.52755	73.2	74.4	10.4931	0.037259
12	B73 x KI11	HTR	9	28.6	4.99093	27.8	36.6	16.6044	-0.046797
13	B73 x KI3	HTR	1	39.2	5.61439	31.2	45.2	14.8868	0.05125
13	B73 x KI3	HTR	10	34.4	4.02347	33.6	35.2	10.3536	0.043161
14	B73 x KY21	HTR	1	34.4	6.37261	25.2	43.6	9.7926	0.041405
14	B73 x KY21	HTR	1	78.8	6.8468	66	85.6	10.7544	0.043685
14	B73 x KY21	HTR	5	17.8	5.46331	7.4	23	8.1499	0.036565
14	B73 x KY21	HTR	6	42.6	3.14054	42.4	43.8	4.7538	0.028422
15	B73 x M162W	HTR	1	35.2	16.9938	25.6	45.2	27.6785	0.081917
15	B73 x M162W	HTR	3	60	3.42154	60	62	4.8106	0.035274
15	B73 x M162W	HTR	5	61.4	7.80867	54.6	71	11.696	0.052715
15	B73 x M162W	HTR	10	34.4	7.41032	27.4	44.4	10.7304	0.050333
15	B73 x M162W	HTR	10	81.8	3.25565	81.6	82.4	4.5402	0.032417
16	B73 x M37W	HTR	1	37.2	11.0888	27.2	46.8	16.5785	0.067392
16	B73 x M37W	HTR	5	-2.6	3.43517	-2.6	-0.6	4.6218	0.035867
16	B73 x M37W	HTR	6	58.6	4.07706	57.4	61.8	5.6247	0.039599
16	B73 x M37W	HTR	8	122.2	3.98497	121.6	124.4	5.3678	0.038662
16	B73 x M37W	HTR	10	35.2	12.7114	22.6	42.4	19.4531	0.073304
16	B73 x M37W	HTR	10	77.6	3.12586	77.2	78.4	4.0361	0.03434
18	B73 x MO18W	HTR	1	35.2	6.92949	25.6	44.8	20.4675	0.048891
18	B73 x MO18W	HTR	6	37.6	6.93022	27.8	47.6	20.8343	0.051022
18	B73 x MO18W	HTR	9	42.2	6.31817	32.2	45	18.9246	-0.047312
18	B73 x MO18W	HTR	10	0.8	3.28283	0	0.8	9.579	-0.033477
18	B73 x MO18W	HTR	10	10.8	3.26653	9.6	12	9.4721	-0.033654
19	B73 x MS71	HTR	1	30.4	4.71822	25.6	40	14.9447	0.036942
19	B73 x MS71	HTR	10	32.6	4.76345	28.6	37.4	14.7454	0.036914
20	B73 x NC350	HTR	1	24.4	8.56364	19.2	34	10.6426	0.061811
20	B73 x NC350	HTR	3	125.2	3.72622	122.8	128.2	4.5708	0.041556
20	B73 x NC350	HTR	4	4.4	3.67146	-1.6	5.6	4.1696	0.040201
20	B73 x NC350	HTR	5	72.2	3.48627	71.4	72.6	3.9711	0.038424
20	B73 x NC350	HTR	9	28.6	4.16646	18.6	33	5.9781	-0.053769
20	B73 x NC350	HTR	9	45	7.79516	40.6	50.2	10.1063	0.070736
20	B73 x NC350	HTR	10	35.4	25.7273	25.2	45	38.4579	0.120239
21	B73 x NC358	HTR	3	119.6	6.91365	111.6	129.6	21.1494	0.04353
21	B73 x NC358	HTR	5	15.8	4.07942	13.8	18.2	11.298	0.031418
21	B73 x NC358	HTR	7	85	3.94929	84.2	91.2	10.8459	-0.030692
21	B73 x NC358	HTR	9	63.8	6.39122	59.4	73.6	19.6485	-0.043121
22	B73 x OH43	HTR	4	92	3.93386	79.2	94	9.9066	-0.025234
22	B73 x OH43	HTR	5	25.4	6.05945	19.8	35	16.6566	0.033895
22	B73 x OH43	HTR	8	58.4	7.77141	50.4	68	22.2804	-0.037338
23	B73 x OH7B	HTR	3	54.4	4.43427	46.4	59.2	12.7598	0.025847
23	B73 x OH7B	HTR	8	57.6	6.88173	47.2	64.8	20.839	-0.031641
23	B73 x OH7B	HTR	10	30.4	7.7559	20	39.8	25.0705	0.035144
24	B73 x P39	HTR	1	33.6	5.77556	22.8	42.4	19.4845	-0.054149
24	B73 x P39	HTR	1	148.8	3.51546	148.8	152.8	12.8341	-0.045834
24	B73 x P39	HTR	4	45.6	5.04773	34.4	50.8	17.3091	0.054362
25	B73 x Tx303	HTR	1	32.4	4.49557	26	39.6	6.1531	0.033231
25	B73 x Tx303	HTR	5	69.8	10.3564	61	80.6	15.2948	0.052238
25	B73 x Tx303	HTR	10	6	6.96826	1.2	8.4	10.8646	-0.046094
25	B73 x Tx303	HTR	10	40.2	10.4287	30	49.8	15.1756	0.055111
26	B73 x TZI8	HTR	1	35.2	4.55147	28.4	40.4	9.2212	0.030068
26	B73 x TZI8	HTR	1	77.6	3.54571	74.4	79.6	6.9604	0.026184
26	B73 x TZI8	HTR	4	108.4	7.24591	98.4	115.2	14.7163	0.039042
26	B73 x TZI8	HTR	9	35.4	4.34369	31	43	8.9399	-0.029496
1	B73 x B97	SWR	2	76.4	3.08769	76.4	76.8	4.8962	-0.018107
1	B73 x B97	SWR	3	70.8	3.59191	70.4	71.2	4.7086	0.018241
1	B73 x B97	SWR	5	19.8	3.85602	15.8	23.4	5.4389	0.019239
1	B73 x B97	SWR	9	45	10.5271	35	54.8	15.904	-0.033057
1	B73 x B97	SWR	10	33.6	9.38888	30.2	50	13.7625	0.030658
2	B73 x CML103	SWR	1	34.8	4.22186	30	38	10.8553	0.028185
2	B73 x CML103	SWR	1	77.2	7.42868	68.4	86.4	21.0118	0.039066
2	B73 x CML103	SWR	5	107	4.48308	105	115	11.9744	-0.028285
2	B73 x CML103	SWR	5	152.4	3.69528	149.8	154.2	9.7269	0.025383
3	B73 x CML228	SWR	2	84	6.50501	74	88	12.8703	-0.030058
3	B73 x CML228	SWR	3	26	3.56706	25.2	27.6	7.3883	0.022466
3	B73 x CML228	SWR	5	21	5.57153	11.4	24.2	10.8939	0.027486
3	B73 x CML228	SWR	9	28.6	8.86656	18.6	38.2	17.8076	-0.035455
4	B73 x CML247	SWR	1	35.2	10.3054	25.2	44.8	17.4127	0.037216
4	B73 x CML247	SWR	2	54.4	3.79355	52.8	55.2	5.9806	-0.021547
4	B73 x CML247	SWR	9	30.2	4.83823	26.2	35	7.8446	-0.024443
4	B73 x CML247	SWR	9	75.6	3.07894	75.6	75.8	4.8648	-0.019355
4	B73 x CML247	SWR	10	45.6	7.32017	36.6	56.4	11.4961	0.030374
5	B73 x CML277	SWR	1	40.8	8.05317	31.2	47.6	17.8631	0.034642
5	B73 x CML277	SWR	2	83.6	4.29293	81.6	89.2	9.7675	-0.025281
5	B73 x CML277	SWR	3	67.6	8.80789	56	75.6	19.3182	0.037667
5	B73 x CML277	SWR	6	48	3.16396	47.8	48.2	6.7373	0.021245
6	B73 x CML322	SWR	1	34	5.30669	30	39.2	7.2379	0.027957
6	B73 x CML322	SWR	5	55.4	4.25919	53.4	58.2	5.9187	0.024941
6	B73 x CML322	SWR	10	33.4	15.5936	25	44.8	24.8491	0.050711
6	B73 x CML322	SWR	10	94.2	3.57938	92.8	97	4.8607	0.022643
7	B73 x CML333	SWR	1	36.4	9.95933	26.4	46	15.8604	0.040512
7	B73 x CML333	SWR	2	80.4	5.39224	67.2	86.8	8.2676	-0.029065
7	B73 x CML333	SWR	9	36.2	16.0457	24.7	48.6	25.9987	-0.051445
7	B73 x CML333	SWR	10	2.8	7.58804	-6.4	12.4	11.7151	0.035786
8	B73 x CML52	SWR	3	26.8	4.25116	22.4	34.4	17.8842	0.036089
8	B73 x CML52	SWR	8	56	4.64677	53.2	57.6	18.674	0.037372
9	B73 x CML69	SWR	2	47.6	3.79874	47.6	58	12.9112	-0.036487
9	B73 x CML69	SWR	2	149.4	5.1483	143.2	157.4	17.6886	-0.042118
9	B73 x CML69	SWR	3	49.6	4.09372	40.8	50.4	13.1391	0.035403
11	B73 x IL14H	SWR	1	42	4.69791	34.4	51.2	9.653	0.028194
11	B73 x IL14H	SWR	10	33.4	3.60707	32.4	36	7.2978	0.023874
12	B73 x KI11	SWR	2	68	3.79539	67.6	72.8	10.224	-0.032307
12	B73 x KI11	SWR	5	35	4.14697	25.4	38.6	11.0628	0.032927
12	B73 x KI11	SWR	9	57	7.14909	53	64.4	20.8339	-0.046405
12	B73 x KI11	SWR	10	29.6	5.44086	28.2	34.8	14.9717	0.0388
13	B73 x KI3	SWR	1	35.6	3.92912	34.4	39.2	11.5523	0.033117
13	B73 x KI3	SWR	10	34.4	4.9361	32.4	39.4	14.3855	0.038333
14	B73 x KY21	SWR	1	34.8	6.37611	27.2	44	10.045	0.025466
14	B73 x KY21	SWR	1	90	4.40285	75.2	92	6.9772	0.021021
14	B73 x KY21	SWR	5	17.8	7.65785	7.4	27	12.3551	0.02785
14	B73 x KY21	SWR	10	32.4	5.00632	27.2	40.4	8.1079	0.022704
15	B73 x M162W	SWR	1	25.2	10.9945	14.4	34.4	18.1181	0.045813
15	B73 x M162W	SWR	5	59.8	6.17435	53	69	9.6347	0.032976
15	B73 x M162W	SWR	10	34.4	10.369	25.2	44.4	16.7191	0.043601
15	B73 x M162W	SWR	10	81.6	3.06007	81.6	81.8	4.3765	0.022142
16	B73 x M37W	SWR	1	36.8	10.4884	27.2	46.8	17.7807	0.041714
16	B73 x M37W	SWR	5	11.4	4.94763	1	17	8.0213	0.028235
16	B73 x M37W	SWR	10	38.2	7.60579	30.2	50	12.8539	0.035814
16	B73 x M37W	SWR	10	78.4	5.37944	69.2	84.4	9.1354	0.031331
18	B73 x MO18W	SWR	6	5	3.60984	1.8	7	10.8768	0.031951
18	B73 x MO18W	SWR	7	60	5.39162	56	61.2	17.8686	-0.05312
19	B73 x MS71	SWR	1	31.6	6.77987	24.8	42.8	19.2838	0.041062
19	B73 x MS71	SWR	9	7.8	4.12314	0.6	11	11.2626	-0.029986
19	B73 x MS71	SWR	10	34.6	5.48146	27.6	39	14.8582	0.035239
20	B73 x NC350	SWR	3	39.6	4.5933	29.2	44.4	6.628	0.029902
20	B73 x NC350	SWR	9	23.4	3.53259	17.8	24.2	5.2194	-0.02854
20	B73 x NC350	SWR	9	45	6.11486	43	54.8	9.0184	0.037873
20	B73 x NC350	SWR	10	34.4	18.9482	24	43.8	32.482	0.067837
21	B73 x NC358	SWR	2	70	3.61631	66.8	73.6	11.5504	-0.026055
21	B73 x NC358	SWR	3	118	4.06205	117.2	119.6	12.7751	0.026637
21	B73 x NC358	SWR	5	17.4	7.39051	7	27.4	24.2615	0.036885
22	B73 x OH43	SWR	4	92	4.52823	87.6	94.8	13.0302	-0.027634
22	B73 x OH43	SWR	9	41.8	4.26108	19.4	45.8	12.068	-0.027778
23	B73 x OH7B	SWR	3	51.6	4.13046	45.6	60.8	12.4066	0.029422
23	B73 x OH7B	SWR	10	73.2	5.67645	58	75	17.19	0.034023
24	B73 x P39	SWR	1	31.2	7.15609	24	43.6	24.9642	-0.056592
24	B73 x P39	SWR	6	66	3.1014	65.8	68.2	10.5738	0.037526
25	B73 x Tx303	SWR	3	77.2	5.20497	76.4	80.8	8.7101	0.026108
25	B73 x Tx303	SWR	3	120.8	3.32169	120	121.2	4.7994	0.020056
25	B73 x Tx303	SWR	5	71	7.18801	61	80.6	11.6797	0.030268
25	B73 x Tx303	SWR	7	76	3.34728	74.4	80.8	5.1354	0.020299
25	B73 x Tx303	SWR	10	5.6	5.50664	1.2	8.4	8.6676	-0.027458
25	B73 x Tx303	SWR	10	39.8	9.30323	30	49.8	15.4608	0.03645
26	B73 x TZI8	SWR	1	35.2	7.30522	25.2	44	13.806	0.032039
26	B73 x TZI8	SWR	3	113.6	3.22011	113.2	123.6	5.6494	-0.020472
26	B73 x TZI8	SWR	4	118.8	8.91677	108.6	128.8	16.7588	0.036457
26	B73 x TZI8	SWR	9	31.8	5.48992	29.8	41.8	10.5333	-0.027976
2	B73 x CML103	DTAR	1	34.4	3.62607	34.4	35.2	11.8422	0.005565
3	B73 x CML228	DTAR	9	28.6	3.47467	27.8	29.4	8.0306	-0.00467
4	B73 x CML247	DTAR	1	34.4	6.0766	24.4	44	12.4207	0.007187
4	B73 x CML247	DTAR	2	57.6	4.46651	53.2	62.4	8.9153	-0.006043
4	B73 x CML247	DTAR	10	30.2	3.55498	25.2	33.6	7.0807	0.005453
5	B73 x CML277	DTAR	1	38	3.78604	33.6	41.2	8.3798	0.006639
5	B73 x CML277	DTAR	4	66	3.58186	63.2	66.8	7.6984	0.00631
5	B73 x CML277	DTAR	9	78.8	3.01928	78.8	79.2	6.3154	-0.005712
5	B73 x CML277	DTAR	10	41	5.4861	37.2	50	12.2036	-0.009344
6	B73 x CML322	DTAR	1	34	7.93975	24	43.6	14.3394	0.011004
6	B73 x CML322	DTAR	9	42.6	3.91564	41.8	43	7.9402	-0.008116
6	B73 x CML322	DTAR	9	51.4	3.55612	49	52.2	7.3548	-0.007801
6	B73 x CML322	DTAR	10	32.4	8.36209	22.4	42.2	15.1493	0.011195
7	B73 x CML333	DTAR	1	61.2	3.66557	58.8	66.4	7.4174	0.00497
7	B73 x CML333	DTAR	9	40.6	8.26666	29.8	49.4	17.6472	-0.007653
7	B73 x CML333	DTAR	10	2	5.77472	-5.2	11.6	12.022	0.006448
8	B73 x CML52	DTAR	8	11.6	3.17983	9.2	14	14.7681	0.007231
8	B73 x CML52	DTAR	8	56.8	4.71339	53.6	57.6	22.4361	0.00888
9	B73 x CML69	DTAR	9	34.6	4.90634	25.4	44.2	14.5267	-0.01234
9	B73 x CML69	DTAR	10	35.8	2.99843	35.6	35.8	8.4489	0.009571
11	B73 x IL14H	DTAR	1	44.4	15.7855	34.4	54	35.3049	0.017558
12	B73 x KI11	DTAR	2	73.2	3.26796	73.2	73.6	10.2481	-0.007606
12	B73 x KI11	DTAR	6	104.4	3.2352	100.8	106.2	10.1378	-0.007586
12	B73 x KI11	DTAR	9	55.2	3.38796	53.4	56.4	13.1681	-0.008766
13	B73 x KI3	DTAR	1	34.4	4.12451	32.4	39.2	13.3898	0.01509
14	B73 x KY21	DTAR	1	48.4	5.72718	37.6	52.4	11.4618	0.007801
15	B73 x M162W	DTAR	1	25.2	5.87341	15.6	34.8	11.2342	0.011434
15	B73 x M162W	DTAR	8	70.4	3.51565	63.2	74.4	6.5498	0.008551
15	B73 x M162W	DTAR	10	45.4	4.49471	38.4	46.8	9.6039	0.010421
16	B73 x M37W	DTAR	1	34.4	6.10298	26	45.6	9.5034	0.013412
16	B73 x M37W	DTAR	4	46.8	3.58835	44	48	5.4514	0.010292
16	B73 x M37W	DTAR	5	-2.2	4.48812	-2.6	7.8	6.89	0.011409
16	B73 x M37W	DTAR	8	122.2	3.73338	121.6	124	5.7448	0.010454
16	B73 x M37W	DTAR	10	32.6	8.30112	27	42.4	14.0422	0.016283
18	B73 x MO18W	DTAR	7	56	3.31772	55.6	56.4	9.6933	-0.006213
19	B73 x MS71	DTAR	1	139.2	3.34754	139.2	139.6	10.1261	-0.005638
19	B73 x MS71	DTAR	9	33	7.3239	29	42.6	24.2773	-0.008854
19	B73 x MS71	DTAR	10	32.6	5.1496	31.4	38.4	16.481	0.007351
20	B73 x NC350	DTAR	10	35.6	16.9942	17.6	45.4	30.4646	0.033648
20	B73 x NC350	DTAR	10	79.8	3.25183	79.6	80.8	5.416	0.013833
21	B73 x NC358	DTAR	9	89	3.77554	86.6	89.4	13.3271	-0.007827
22	B73 x OH43	DTAR	1	4	4.5056	-4.8	6.8	14.7352	0.005017
22	B73 x OH43	DTAR	9	9.8	3.36466	8.2	10.2	10.868	-0.004214
22	B73 x OH43	DTAR	10	30.8	5.18925	26.2	40.8	18.2164	0.00583
24	B73 x P39	DTAR	2	14.4	3.92671	11.6	20	13.3262	-0.008616
24	B73 x P39	DTAR	4	43.2	4.83725	33.6	49.2	17.3122	0.010942
25	B73 x Tx303	DTAR	1	16	3.51489	15.2	17.2	5.5515	0.006175
25	B73 x Tx303	DTAR	5	64.2	7.62012	54.6	74.2	13.0403	0.009516
25	B73 x Tx303	DTAR	10	6.4	5.67181	1.2	8.4	9.3972	-0.00849
25	B73 x Tx303	DTAR	10	28.2	4.23621	26	38	6.8717	0.007419
26	B73 x TZI8	DTAR	3	74.8	3.58981	66	75.6	7.0279	0.005575
26	B73 x TZI8	DTAR	3	95.2	5.49016	92.4	98.8	11.9106	-0.007375
26	B73 x TZI8	DTAR	4	110.2	4.74177	101	118	9.4381	0.005887
26	B73 x TZI8	DTAR	9	41.8	6.4572	31.8	48.6	13.4117	-0.006922
